Jobe et al., 2020

1 **Respiratory syncytial virus sequesters NF- $\kappa$ B subunit p65 to**  
2 **cytoplasmic inclusion bodies to inhibit innate immune signalling**

3 Fatoumatta Jobe<sup>1</sup>, Jennifer Simpson<sup>1</sup>, Philippa Hawes<sup>1</sup>, Efrain Guzman<sup>1\*</sup>, Dalan  
4 Bailey<sup>1</sup>¥

5  
6 <sup>1</sup>The Pirbright Institute, Ash Rd, Guildford, Surrey, UK, GU24 0NF.

7 \*: Current address: Oxford Biomedica (UK) Ltd., Windrush Court, Transport Way,  
8 Oxford, UK, OX4 6LT.

9 ¥: Corresponding author: [dalan.bailey@pirbright.ac.uk](mailto:dalan.bailey@pirbright.ac.uk)

10 **Abstract**

11 Viruses routinely employ strategies to prevent the activation of innate immune  
12 signalling in infected cells. RSV is no exception, encoding two accessory proteins  
13 (NS1 and NS2) which are well established to block Interferon signalling. However,  
14 RSV-encoded mechanisms for inhibiting NF- $\kappa$ B signalling are less well characterised.  
15 In this study we identified RSV-mediated antagonism of this pathway, independent of  
16 the NS1 and NS2 proteins, and indeed distinct from other known viral mechanisms of  
17 NF- $\kappa$ B inhibition. In both human and bovine RSV infected cells we demonstrated that  
18 the P65 subunit of NF- $\kappa$ B is rerouted to perinuclear puncta in the cytoplasm, puncta  
19 which are synonymous with viral inclusion bodies (IBs), the site for viral RNA  
20 replication. Captured P65 was unable to translocate to the nucleus or transactivate a  
21 NF- $\kappa$ B reporter following TNF- $\alpha$  stimulation, confirming the immune-antagonistic  
22 nature of this sequestration. Subsequently, we used correlative light electron  
23 microscopy (CLEM) to colocalise RSV N protein and P65 within bRSV IBs; granular,  
24 membraneless regions of cytoplasm with liquid organelle-like properties. Additional  
25 characterisation of bRSV IBs indicated that although they are likely formed by liquid-  
26 liquid phase separation (LLPS), they have a differential sensitivity to hypotonic shock  
27 proportional to their size. Together, these data identify a novel mechanism for viral  
28 antagonism of innate immune signalling which relies on sequestration of the NF- $\kappa$ B  
29 subunit p65 to a biomolecular condensate – a mechanism conserved across the  
30 *Orthopneumovirus* genus and not host-cell specific. More generally they provide

Jobe et al., 2020

31 additional evidence that RNA virus IBs are important immunomodulatory complexes  
32 within infected cells.

### 33 **Impact summary**

34 Many viruses replicate almost entirely in the cytoplasm of infected cells, without too  
35 many direct interactions with the nucleus. Examples include respiratory syncytial virus  
36 (RSV), measles, Ebola and Nipah; however, how these pathogens are able to  
37 compartmentalise their life cycle to provide favourable conditions for replication and to  
38 avoid the litany of antiviral detection mechanisms in the cytoplasm remains relatively  
39 uncharacterised. In this paper we show that bovine RSV (bRSV), which infects cattle,  
40 does this by generating inclusion bodies in the cytoplasm of infected cells. These  
41 organelles are unusually membrane-less; likely forming by a process called liquid-  
42 liquid phase separation which involves macro-molecular interactions between the viral  
43 proteins N and P. We also showed that these organelles, otherwise known as inclusion  
44 bodies (IBs), are able to capture important innate immune transcription factors (in this  
45 case NF- $\kappa$ B), blocking the normal signalling processes that tell the nucleus the cell is  
46 infected. Using fluorescent bioimaging and a combination of confocal and electron  
47 microscopy we then characterised this interaction in detail, also confirming that human  
48 RSV (hRSV) employs the same mechanism. Like hRSV, bRSV viral RNA replication  
49 also takes place in the IB, likely meaning these organelles are a functionally conserved  
50 feature of orthopneumoviruses.

### 51 **Introduction**

52 Bovine and human respiratory syncytial viruses (bRSV and hRSV, respectively), are  
53 closely related viruses that cause acute respiratory illness in cattle and humans,  
54 respectively. The viruses infect all ages, but severe illness associated with bronchiolitis  
55 and pneumonia is more common in calves (for bRSV) and infants, the elderly and  
56 immunocompromised (for hRSV) [1, 2]. Although the process is poorly understood,  
57 immune responses to RSV infections are incomplete leading to re-infection, even in  
58 healthy adults [3]. In high-risk groups hRSV infection can be fatal; however, there is  
59 no approved vaccine and only a single therapeutic option, monoclonal antibodies  
60 against the F protein. Whilst there are available bRSV vaccines these are mildly  
61 protective and there is evidence for an exacerbation of natural infection [4]. Both  
62 viruses were recently taxonomically reclassified as species *Bovine* and *Human*

Jobe et al., 2020

63 *orthopneumovirus* within the *Orthopneumoviridae* genus of the *Pneumoviridae* family  
64 [5].

65 bRSV and hRSV are enveloped viruses with a single-stranded negative sense RNA  
66 genome, ~15 kb in length, which encodes 11 proteins from 10 mRNAs. Although bRSV  
67 and hRSV are restricted to their individual hosts, the viruses and the diseases they  
68 cause are similar, making bRSV an excellent model for studying RSV-host  
69 interactions. Virus infection and replication within the cell triggers pattern recognition  
70 receptors (PRRs) such as toll-like receptors (TLRs) and cytoplasmic nucleic acid  
71 receptors (RIG-I and MDA-5), which in turn induce NF- $\kappa$ B- and IRF-dependent  
72 signalling [6-8]. NF- $\kappa$ B and IRF are two families of transcription factors that exist as  
73 homo- or heterodimers and their activation is regulated at multiple levels. For example,  
74 NF- $\kappa$ B p65/p50 dimers are sequestered in the cytoplasm bound to the inhibitor I $\kappa$ B $\alpha$   
75 [9, 10]. Phosphorylation of I $\kappa$ B $\alpha$  by the I $\kappa$ B kinase (IKK) complex targets it for  
76 proteasomal degradation releasing p65/p50 for phosphorylation and translocation into  
77 the nucleus. Activation and nuclear translocation of IRF-3 homodimers also depends  
78 on phosphorylation, through the kinases TBK1/IKK $\epsilon$  [11]. Upon activation, these  
79 critical transcription factors regulate host cell innate responses, e.g. by inducing  
80 cytokines with antiviral activity including type 1 interferons (IFNs), tumour necrosis  
81 factor alpha (TNF $\alpha$ ) and interleukin-1 (IL-1). Importantly, the mechanisms by which  
82 RSV induce or inhibit these signalling pathways is not fully understood.

83 To overcome this ubiquitous first line of defence, viruses have evolved various  
84 inhibitors to modulate these pathways. Viral immune evasion mechanisms include the  
85 targeting of receptors, adaptor proteins and/or intracellular kinases in the signalling  
86 pathways described above, or indeed directly targeting the transcription factors and  
87 their regulators [12, 13], and in this regard RSV is no exception. The RSV SH protein  
88 has been shown to be involved in inhibiting NF- $\kappa$ B activation [14, 15], although the  
89 exact mechanism of this antagonism is yet to be characterised. As an alternative  
90 strategy the RSV NS1 and NS2 proteins have been shown to antagonise IFN-  
91 mediated host responses by targeting both type I and III IFN induction [16-18] and  
92 signalling [19]. In addition, NS2 interacts with RIG-I inhibiting its interaction with the  
93 mitochondrial antiviral-signalling protein (MAVS) [20]. Similarly, NS1 can inhibit  
94 phosphorylation of IRF-3 by interacting with MAVS [21]. Recently, the NS proteins  
95 have also been shown to be involved in the formation of an “NS-degradosome” that

Jobe et al., 2020

96 promotes the degradation of components of IFN induction or signalling, including RIG-  
97 I, IRF-3, IRF-7, TBK1 and STAT2 [22]. Consequently, activation of the cytotoxic T  
98 lymphocyte component of the adaptive immune response is also suppressed [23].  
99 hRSV has also been shown to employ an additional mechanism of innate immune  
100 antagonism whereby MAVS and MDA-5 are sequestered into inclusion bodies (IBs),  
101 likely through interaction with the RSV nucleoprotein (N protein) [24]. Other cellular  
102 proteins involved in the cellular response to viral infection such as, p38 mitogen-  
103 activated protein kinase (MAPK) and O-linked *N-acetylglucosamine* transferase  
104 (OGT) have also been shown to be recruited into IBs [25].

105 The cytoplasmic inclusion bodies induced by hRSV infection share many  
106 characteristics with liquid organelles or biomolecular condensates [24-26]. They are  
107 also structurally and functionally similar to viral inclusions formed by rabies, human  
108 metapneumovirus and measles viruses [27-30] and likely represent an essential  
109 component of the lifecycle of many negative sense RNA viruses. For the  
110 pneumoviruses, these membraneless organelles have been shown to contain N, P, L  
111 and M2-1 [26, 29-31]; viral proteins involved in viral genome replication and mRNA  
112 transcription, together with the M protein. This presence of viral genomic RNA and  
113 mRNA within the IB strongly suggests that these organelles are the primary site for  
114 viral RNA replication within the infected cell [26], although this does not appear to be  
115 universal a trend, since viral RNA replication of Nipah virus (NiV) was recently shown  
116 to occur outside of both of its structurally distinct IB-populations [32]. For RSV and  
117 related viruses, ectopic coexpression of the N and P proteins alone results in the  
118 formation of IB-like structures, indicating a evolutionarily conserved mechanism for IB  
119 formation [24, 26, 28, 30, 31]. Collectively, these data provide strong evidence that  
120 events in the bRSV life cycle are not randomly distributed throughout the cell  
121 cytoplasm; instead, components of the viral genome, replication machinery and its  
122 intermediates are likely to be sequestered away from innate immune sensors in  
123 intracellular compartments which are *de facto* viral replication complexes. However,  
124 to date there is no evidence on the formation of IBs in bRSV infected cells nor, more  
125 broadly, any detailed characterisation of the immunomodulatory effects of the RSV IB  
126 on two integral innate immunity transcription factors, NF- $\kappa$ B and IRF3.

127 Here, we show that in both hRSV and bRSV infected cells, the NF- $\kappa$ B subunit p65 is  
128 rapidly sequestered into perinuclear intracytoplasmic puncta. Consequently, activation

Jobe et al., 2020

129 and nuclear translocation of sequestered NF- $\kappa$ B p65 in response to virus infection and  
130 TNF $\alpha$  stimulation are both inhibited. Using both immunofluorescence confocal  
131 microscopy and correlative light electron microscopy (CLEM) these puncta were found  
132 to be synonymous with the RSV inclusion bodies induced by virus infection.  
133 Transmission electron microscopy confirmed that bRSV IBs are not membrane-bound  
134 but liquid organelles, likely formed following liquid-liquid phase separation (LLPS).  
135 Interestingly, IBs formed by ectopic N and P coexpression were also proficient in  
136 colocalising p65. In addition, p65 recruitment was not host-range specific with both  
137 human and bovine RSV being capable of sequestering p65, regardless of host cell  
138 origin. In addition, we present the first detailed evidence of IB formation in bRSV  
139 infected cells, confirming that these viral organelles are the sites of viral RNA  
140 replication. Taken together, our data shows an evolutionarily conserved mechanism  
141 by which RSV IBs function to compartmentalise viral replication and actively  
142 antagonise the innate immune response to infection.

## 143 **Results**

### 144 **BRSV infection induces IRF3, but not NF- $\kappa$ B, nuclear translocation**

145 Given the established role of NF- $\kappa$ B and IRF3 signalling pathways in the cell's innate  
146 response and clearance of viral infection, we used multiple approaches to examine  
147 the activation of these transcription factors following bRSV infection. Vero cells were  
148 infected with bRSV at a multiplicity of infection (MOI) of 1 for 24h. Cells were then  
149 immuno-stained for bRSV F as a marker for infection as well as for the NF- $\kappa$ B subunit  
150 p65 or, separately, IRF3. Immunofluorescence (IF) analysis of mock-infected cells  
151 confirmed that both transcription factors are normally located in the cytoplasm (Fig  
152 1A). When the NF- $\kappa$ B and IRF3 pathways were stimulated in mock-infected cells with  
153 agonist treatment (hTNF $\alpha$  and poly[I:C], respectively), both the NF- $\kappa$ B subunit p65 and  
154 IRF3 translocated from the cytoplasm to the nucleus, as expected (Fig 1A top panel;  
155 inset zooms). However, although infection with bRSV induced similar levels of IRF3  
156 nuclear translocation (Fig 1A; bottom right panel), significantly the NF- $\kappa$ B subunit p65  
157 remained cytoplasmic, coalescing into intracytoplasmic puncta, mostly perinuclear  
158 and present only in infected cells (Fig 1A; bottom left panel). Fluorophore intensity  
159 profile analysis was then performed to assess the relative accumulation of both p65  
160 and IRF3 in infected and/or stimulated cells. For IRF3, poly(I:C) stimulation of infected  
161 cells enhanced its nuclear translocation, relative to uninfected cells (Fig 1A; bottom

Jobe et al., 2020

162 right – inset zoom). However, IF and intensity profile analysis revealed that, even in  
163 the case of hTNF $\alpha$  stimulation, p65 nuclear translocation in bRSV infected cells was  
164 absent and that most p65 remained in the observed perinuclear puncta (Fig 1A; bottom  
165 left – inset zoom). bRSV can infect a broad range of host cells *in vitro* – growing to  
166 similar titres in both Vero and Madin-Darby bovine kidney (MDBK) cells  
167 (supplementary Fig 1A and B). To examine the apparent innate immune antagonism  
168 in bovine cells, equivalent infections were performed in MDBK cells. These  
169 experiments confirmed the same p65 sequestration into perinuclear puncta following  
170 bRSV infection, as well as the related insensitivity to TNF $\alpha$  stimulation (supplementary  
171 Fig 1C) indicating a conserved mechanism of antagonism active in both primate and  
172 ruminant cells.

173 To examine the effect of this sequestration on NF- $\kappa$ B signalling, we next employed a  
174 luciferase reporter assay to assess NF- $\kappa$ B transactivation. HEK293T cells were  
175 infected with bRSV at an MOI of 1, before being transfected with the NF- $\kappa$ B reporter  
176 and subsequently treated with or without TNF $\alpha$  (Fig 1B). Interestingly, infection without  
177 TNF $\alpha$  treatment did not result in any significant activation of the reporter, despite  
178 demonstrable viral protein production (Fig 1B, black bars and RSV F western blot),  
179 indicating that even in the presence of active viral replication there is little to no  
180 activation of the NF- $\kappa$ B signalling pathway in bRSV-infected cells. Indeed, activation  
181 of the NF- $\kappa$ B reporter was only seen following addition of 20 ng/ml of exogenous  
182 hTNF $\alpha$ ; however, this activation was significantly less in infected cells, when  
183 compared to the mock (Fig 1B, grey bars). Separately, we also examined protein  
184 levels of p65 (total and transiently phosphorylated) and I $\kappa$ B $\alpha$ , components of NF- $\kappa$ B  
185 signal transduction, in infected Vero cells with and without TNF $\alpha$  stimulation. As  
186 expected TNF $\alpha$  treatment of mock-infected cells resulted in an increase in p65  
187 phosphorylation and a decrease in total I $\kappa$ B $\alpha$  (presumably the result of proteasomal  
188 degradation following its own phosphorylation) (Fig 1C; mock +/- TNF $\alpha$ ) [9]. The  
189 detected levels of phospho-NF $\kappa$ B p65 and total I $\kappa$ B $\alpha$  in infected cells (Fig 1C; infected  
190 +/- TNF $\alpha$ ) confirmed the lack of activation during infection and also the modest NF- $\kappa$ B  
191 activation induced by bRSV infection with subsequent TNF $\alpha$  treatment observed in Fig  
192 1B. Together, the data strongly suggests that NF- $\kappa$ B signalling is inhibited by bRSV  
193 infection due to its sequestration into intracytoplasmic puncta. Importantly, these data  
194 also indicate that the sequestered p65 is not in a transcriptionally active state, since



Jobe et al., 2020

195 infection did not result in a marked increase in p65 phosphorylation nor evidence for  
196 demonstrable I $\kappa$ B $\alpha$  degradation.

197 **BRSV replication induces the recruitment of the NF- $\kappa$ B subunit p65 into intra-**  
198 **cytoplasmic bodies distinct from stress granules**

199 NF- $\kappa$ B p65 puncta were only observed in bRSV infected cells showing detectable  
200 levels of F protein, indicating a correlation between productive infection and  
201 sequestration (Fig 1A). To examine this correlation and define the kinetics of p65  
202 sequestration over time, MDBK cells were infected at an MOI of 1 and fixed at different  
203 times post infection (p.i), before being permeabilised and the distribution of p65 and  
204 RSV F analysed by IF. Detectable NF- $\kappa$ B p65 puncta ( $>3 \mu\text{m}^2$ ) were apparent in  
205 infected cells by 16 h p.i. (Fig 2B), correlating with significant levels of F expression  
206 (Fig 2A). Interestingly, two populations of F protein were present at this stage, a  
207 perinuclear, presumably ER- or vesicle-associated population (Fig 2A; white arrow),  
208 and a peripheral more filamentous-like population, possibly the site of virion  
209 biogenesis (Fig 2A; beige arrow) – neither of which appeared to colocalise in any  
210 significant way with p65. By 24 h p.i., all infected cells contained at least one p65  
211 puncta with none being observed in nearby uninfected cells. Using fluorophore line of  
212 interest analysis, we were also able to assess the ratio of cytoplasmic- to puncta-  
213 localised p65 as well as the increasing diameter of these aggregates. As infection  
214 proceeded the intensity of p65 in the puncta increased as the level of disperse p65 in  
215 the cytoplasm decreased (Fig 2C; ‘p65 in puncta’ vs. ‘p65 outside puncta’), indicating  
216 coalescence, and supporting our observations in Fig 1C that the total amount of p65  
217 in cells does not dramatically change during infection, only its sub-cellular localisation.  
218 Average puncta size increased as infection progressed with p65 aggregations at 48 h  
219 p.i. having a mean area of  $22.18 \mu\text{m}^2$  (Fig 2B). Smaller p65 puncta ( $<10 \mu\text{m}^2$ ) were  
220 also observed at 48 h p.i., most likely the result of nascent infections in nearby cells.  
221 By this time F protein expression was markedly different, with less distinct populations  
222 of protein; however, there was still no obvious co-localisation with the p65 puncta. A  
223 similar pattern of results was also observed in Vero cells (supplementary Fig 2).

224 Our first line of inquiry following the identification of p65 puncta in bRSV infected cells  
225 was based on their visual similarity to protein and mRNA aggregations that form in  
226 cells in response to cellular stress and viral infections, so-called stress granules (SG).  
227 A wide range of viruses have been shown to either induce or inhibit SG formation to

Jobe et al., 2020

228 their advantage [33]; however, there are contradictory findings on SG induction by  
229 RSV [25, 34-36]. To examine the potential relationship between these p65 puncta and  
230 SG we induced SG formation in bRSV infected cells with sodium arsenite treatment  
231 and performed co-immunostaining for p65 and G3BP1 (a SG marker) in fixed cells.  
232 Although we were able to successfully stimulate the production of SGs in Vero cells  
233 our analysis showed that the p65 puncta were entirely distinct from these granules  
234 (Fig 2D). Tangentially, this experiment also demonstrated that bRSV infection does  
235 not significantly induce SG formation.

### 236 **The NF- $\kappa$ B subunit p65 co-localises with viral inclusion bodies independently of** 237 **RSV-encoded immunomodulators**

238 RSV has a relatively small genome, encoding 11 proteins from 10 genes (Fig 3A).  
239 Recent work has demonstrated that hRSV infection induces the formation of inclusion  
240 bodies (IB) which contain components of the RNA polymerase complex and  
241 ribonucleoprotein (RNP), notably N and P [26]; however, to our knowledge, similar IBs  
242 have not been identified, or functionally characterised, in bRSV-infected cells. To  
243 examine the presence of IBs, the distribution of bRSV proteins and, collectively, their  
244 sub-cellular localisation in relation to the observed p65 puncta, we infected Vero cells  
245 and fixed them, along with mock infected cells, for IF analysis at 24 h p.i. These cells  
246 were then co-immunostained for p65 and bRSV N, P, M or F proteins. As expected,  
247 neither p65 puncta or bRSV proteins were detected in mock infected cells (Fig 3B).  
248 Similarly, as described in Fig 1 and 2 RSV F did not colocalise with p65 or show  
249 evidence of sub-cellular localisation with IB-like structures. In contrast, in infected  
250 cells, three of the viral proteins (N, P and M) predominately localised to large  
251 intracytoplasmic organelles, characteristic of viral inclusion bodies (Fig 3B; green  
252 panels), although smaller N-positive IBs were also present (see below). Although there  
253 was a varying degree of cytoplasmic signal for N, P and M outside of the IBs, most of  
254 the IF signal was found within these structures (Fig 3B; zoomed inset and line of  
255 interest plots). The sub-IB localisation of bRSV N and P was similar to that previously  
256 described for hRSV, with N and P being found on the periphery of the organelle [26].  
257 The significant intra-IB localisation of the M protein at 24 h p.i., as well as its partial  
258 nuclear localisation, is consistent with previously reported IF in RSV-infected cells [37,  
259 38]. However, the role of M in RNA virus IBs reflects an interesting point of divergence;  
260 with some viral IBs being M positive (e.g. RSV) and others negative (e.g. rabies) [39].



Jobe et al., 2020

261 Significantly, the larger N, P or M-positive IBs were, in the majority of cases, also p65  
262 positive (Fig 3B; red IF panels) identifying, for the first time, that this NF- $\kappa$ B component  
263 was being recruited to RSV inclusion bodies in infected cells. To examine this in detail  
264 we next characterised the number, size and p65 status of N-positive IBs in infected  
265 cells, observing that they were numerous and mostly localised in the median section  
266 of the cell. We therefore obtained images from multiple planes in this section to  
267 assemble max intensity z-stacks to aid quantification. From 16 h p.i., N and p65  
268 positive IBs were evident throughout the cell in a conserved pattern consisting of a  
269 single, large and perinuclear IB with multiple smaller inclusions more evenly distributed  
270 through the cytoplasm (Fig 3C, supplementary Fig 3 and supplementary video 1 and  
271 2). Using z-stacks, we quantified the number per cell (counting 18 cells per sample,  
272 per timepoint) and surface area of N and/or p65 positive structures  $>0.1 \mu\text{m}^2$ ,  
273 observing these both increasing as infection progressed. The average number of IBs  
274  $>0.1 \mu\text{m}^2$  grew from 1.7 per cell at 6 h p.i., to 23.8 at 24 h p.i. (Fig 3D). Their mean  
275 area also increased to  $8.99 \mu\text{m}^2$  by 24 h p.i. (Fig 3E), significantly influenced by the  
276 presence and growth of the larger IB. p65 positive IBs were detected from 16 h p.i.;  
277 however, p65 was only detected in larger IBs ( $>1.39 \mu\text{m}^2$ ) (Fig 3E) with up to 4 of these  
278 being evident per cell (Fig 3D). In conclusion, although multiple N-positive IBs are  
279 present in infected cells it is predominantly the larger IBs which contain the  
280 sequestered p65. Together, these data suggest that bRSV infection induces the  
281 formation of IBs in the cytoplasm of infected cells, organelles which are also involved  
282 in sequestering cellular proteins to effect immunomodulation. To our knowledge, this  
283 represents an entirely novel mechanism of viral inhibition of NF- $\kappa$ B signalling, since it  
284 is the sequestration of signalling components to a viral organelle, rather than the  
285 degradation commonly seen [12, 22], which leads to the innate immune antagonism  
286 witnessed in Fig 1.

287 We next examined whether the established bRSV-encoded immunomodulatory  
288 proteins - NS1, NS2 [18] and SH [14, 15] - are responsible for this p65 sequestration.  
289 We infected cells with wild type bRSV (wt), or recombinant bRSVs which do not  
290 express these proteins ( $\Delta$ NS1,  $\Delta$ NS2,  $\Delta$ NS1/2 (a double knockout) or  $\Delta$ SH - [15, 40]).  
291 At 24 h p.i., infected cells were fixed and co-immunostained for p65 and the RSV F  
292 protein. To confirm deletion of SH, immunostaining was performed using an anti-SH  
293 antibody (supplementary Fig 4A). Since we did not have access to anti-NS antibodies,

Jobe et al., 2020

294 the genotype of these mutants was confirmed by RT-PCR, on RNA extracted from  
295 infected cells targeting the region of NS deletion (supplementary Fig 4B). IF analysis  
296 of these samples identified p65 puncta in all infected cells (Fig 3F), suggesting that  
297 these bRSV encoded immunoantagonists do not play a significant role in either the  
298 formation of IBs or the sequestration of p65 to these structures.

299 **bRSV IBs are sites of RNA replication but p65 does not specifically co-localise**  
300 **with M2-1 or nascent viral RNA in IB-associated granules (IBAGs)**

301 hRSV inclusion bodies have previously been shown to be the sites of virus  
302 transcription and replication [25, 26, 41]. To confirm bRSV IBs are also the site of viral  
303 RNA replication, we carried out nascent RNA labelling using 5-ethynyl-uridine (5EU)  
304 incorporation. Mock infected MDBK cells, incubated with 5EU for 1 h, revealed, as  
305 expected, 5EU incorporation into cellular RNA in the nucleus (Fig 4A; top row). When  
306 cellular transcription was inhibited following pre-incubation of mock infected cells with  
307 actinomycin D (Act D) for 1 hr this signal was lost. 5EU labelling performed on bRSV  
308 infected cells without Act D treatment did not reveal significant evidence for viral  
309 replication in IBs; perhaps due to over-representation of cellular RNA synthesis.  
310 However, in the presence of Act D, labelled, newly synthesised RNA could only be  
311 seen in the N-positive IBs, presumably the result of viral replication. This co-  
312 localisation of 5EU incorporation and N-protein within IBs provides strong evidence  
313 that bRSV IBs are the sites of viral RNA replication. A more detailed look at the IBs  
314 (Fig 4A; inset zoom and line of interest plot - asterisks) revealed partial sub-IB  
315 organisation to the RNA found within these structures. Interestingly, a recent study on  
316 hRSV IBs identified similar functional compartments within IBs termed inclusion body-  
317 associated granules (IBAGs) [26]. These were shown to concentrate newly  
318 synthesised viral mRNA and the viral M2-1 protein but not genomic RNA, or the N, P  
319 and L proteins. To confirm the presence of IBAGs in bRSV IBs we immuno-stained  
320 bRSV-infected cells for M2-1 following nascent viral RNA labelling, observing co-  
321 localisation of both these components (Fig 4B). The intra-IB organisation of RNA  
322 replication and M2-1 protein into IBAGs appears, therefore, to be a structurally  
323 conserved aspect of orthopneumovirus IBs. We next examined the potential co-  
324 localisation of p65 with these sites of nascent vRNA localisation (IBAGs). Although we  
325 observed partial sub-IB localisation signals for p65, this did not always co-localise with  
326 vRNA (Fig 4B) or, in subsequent experiments, M2-1 (Fig 4C). These findings suggest

Jobe et al., 2020

327 that there are multiple sub-compartments within bRSV IBs, in addition to IBAGs, which  
328 potentially carry out a distinct range of functions.

### 329 **bRSV IBs are membraneless liquid organelles**

330 IBs and IB-like structures form by liquid-liquid phase separation (LLPS) which favours  
331 macromolecular-macromolecular over macromolecular-water interactions [42-44].  
332 The resulting biomolecular condensates are not surrounded or compartmentalised by  
333 a membrane, distinguishing them from many other organelles found in the cytoplasm  
334 [44, 45]. To examine the ultrastructural properties of the bRSV IBs we first performed  
335 standard transmission electron microscopy (TEM) of infected cells. Vero cells were  
336 infected with bRSV at an MOI of 1 and fixed for TEM analysis at 24 and 48 h p.i.  
337 Granular structures with high electron density, characteristic of RNA virus inclusion  
338 bodies, were identified at both timepoints, often in close proximity to the nucleus (Fig  
339 5A). Smaller structures (1-2  $\mu\text{m}$  in diameter) were predominately rounder in nature  
340 when compared to their larger ( $>3$   $\mu\text{m}$  in diameter), more pleomorphic counterparts  
341 (Fig 5A). As expected, these structures were not membrane-bound or directly  
342 associated with sub-cellular organelles; however, rough endoplasmic reticulum (RER)  
343 and mitochondria were frequently found in close proximity (Fig 5A). These structures  
344 are similar to those previously reported for other RNA viruses [28, 39], supporting our  
345 conclusion that bRSV also forms membraneless IBs in infected cells.

346 Various reports have also demonstrated that IBs can rapidly change their size due to  
347 fusion or fission whilst remaining spherical in nature, a characteristic feature of these  
348 liquid organelles [42]. Rabies virus inclusion bodies, termed negri bodies, have been  
349 shown to rapidly dissolve and reform in response to hypotonic shock, demonstrating  
350 the dynamic nature of these structures [27, 28, 46]. To assess the sensitivity of bRSV  
351 IBs to hypotonic shock, Vero cells, infected with bRSV for 24 h, were incubated with  
352 DMEM (diluted to 20% in  $\text{H}_2\text{O}$ ) for 20 mins. Cells were then fixed and immunostained  
353 for N protein. Many smaller IBs showed evidence of dissolution following hypotonic  
354 shock (Fig 5B; iv); however, unlike rabies virus negri bodies, the larger bRSV IBs  
355 remained intact following this significant period of cellular osmotic shock (Fig 5B; iii).  
356 Of note, incubation beyond 20 minutes was not possible because of the associated  
357 cytotoxicity. In addition, a large percentage of the sequestered p65 in these larger IBs  
358 remained tightly associated with the intact structure (Fig 5C). Recently, Zhou et al.,  
359 demonstrated that larger measles IBs had slower rates of fluorescence recovery after

Jobe et al., 2020

360 photobleaching (FRAP), relative to their smaller counterparts, postulating that these  
361 structures had acquired a more gel-like property. The acquisition of this gel-like status,  
362 which are also less likely to exchange molecules with the surrounding cytoplasm, has  
363 been linked to aging of phase separated organelles - a continuum which ends with the  
364 formation of irreversible aggregates [47]. The insensitivity of large bRSV IBs to osmotic  
365 shock, and the maintenance of p65 within the IB even under these harsh conditions,  
366 is perhaps the result of them acquiring gel-like status, a property which may be linked  
367 to the age and size of individual IBs within infected cells.

368 Finally, to examine the sub-IB localisation of RSV N and p65 in relation to our  
369 ultrastructural analysis of IBs, we performed correlative light electron microscopy  
370 (CLEM). Vero cells were infected at an MOI of 1 and analysed at 24 and 48 h p.i.,  
371 firstly by confocal microscopy using N and p65 antibodies to immunolabel these  
372 proteins (Fig 5D). The same cells, identified by grid reference, were then isolated,  
373 embedded and sectioned with their ultrastructure subsequently analysed by TEM.  
374 Importantly, these CLEM data confirmed that the electron dense granular structures  
375 seen by TEM (Fig 5A) are synonymous with the N, P, M and p65 stained IBs seen in  
376 IF microscopy (Fig 3B). To our knowledge this is the first CLEM to be performed on  
377 an RNA virus IB. An overlay of the two images confirmed that bRSV IBs had retained  
378 the electron dense granular structure characteristic of liquid organelles, even with the  
379 chemical permeabilization required for IF antibody labelling (Fig 5C and  
380 supplementary Fig 5). Our CLEM data also confirmed the p65 and N proteins localising  
381 to the IB, with p65 present within the structure and N around the periphery. At 24 h  
382 p.i., the p65-positive IB structures were mostly spherical, becoming larger and more  
383 irregularly shaped by 48 h p.i., possibly as a result of transition into a more gel-like  
384 status, as discussed above. A similar pattern of immunostaining and IB morphology  
385 was also observed in bRSV-infected MDBK cells analysed by CLEM (Supplementary  
386 Fig 5).

### 387 **Co-expression of bRSV N and P proteins induces the formation of IB-like** 388 **structures which can sequester p65**

389 In the absence of infection, ectopic co-expression of many *Mononegavirales* N and P  
390 proteins has been shown to result in the formation of IB-like structures [24, 26, 28, 30]  
391 – a finding which has been linked to their potential to induce LLPS independently of  
392 viral infection. Although there has been broad discussion that this is related to the

Jobe et al., 2020

393 presence of intrinsically disordered regions within the N and P proteins, a definitive  
394 functional mechanism for this viral-induced LLPS remains uncharacterised. In  
395 addition, whether these infection-independent IB-like structures retain all the  
396 properties of viral IBs is not entirely clear. For hRSV it was shown that IBAGs do not  
397 form within these visually orthologous bodies [26]; however, the recruitment of MDA5  
398 and MAVS to IB-like structures, following N and P overexpression, was maintained  
399 [24]. To address similar questions for bRSV IBs, and to examine the related  
400 sequestration of p65, Vero cells transiently transfected with plasmids expressing  
401 bRSV N (pN) and bRSV P (pP) were fixed and stained at 24 h post transfection and  
402 examined by IF. As has been reported previously, expression of N or P alone did not  
403 lead to the formation of IB-like structures; however, co-expression did, resulting in the  
404 formation of inclusions up to  $6.9 \mu\text{m}^2$  in area (Fig 6A). Examination of the sub-cellular  
405 localisation of p65 in this system also confirmed that the N- and P-induced inclusions  
406 were proficient in sequestering p65, independent of viral replication, with a pattern of  
407 expression mirroring that seen in infected cells (Fig 6A; inset zoom and fluorescent  
408 line of interest analysis).

409 To examine the mechanism of p65 recruitment to, and sequestration within, the bRSV  
410 IB we next investigated whether there was evidence for direct protein-protein  
411 interactions between this protein and N or P. Endogenous p65 or p65 expressed from  
412 a plasmid (pP65) were immunoprecipitated from bRSV-infected, or mock-infected,  
413 293T cells (at 24 h p.i) using an anti-p65 antibody. When these immuno-precipitates  
414 were analysed by western blot, both bRSV N and P were found to co-  
415 immunoprecipitate (co-IP) with endogenous or overexpressed p65 in infected cell  
416 lysates, providing evidence of direct interactions being maintained post-lysis (Fig 6B).  
417 Experiments with beads alone did show a small amount of co-IP N protein; however,  
418 this was markedly lower than in the p65 antibody experiment, background signal which  
419 we believe may be the consequence of the high levels of N protein in infected cells at  
420 24 h p.i. In summary, our results indicate that p65 recruitment into bRSV IBs is  
421 maintained even in IB-like structures formed after N and P overexpression.  
422 Furthermore, the recruitment of p65 to IBs is likely due to specific interactions with the  
423 N and/or P proteins. Since RSV N and P are known to interact, yet the IB does not  
424 form without both proteins being expressed together, more detailed characterisation  
425 of this interaction is required to define the true binding partner, either N or P.



Jobe et al., 2020

426 **The sequestration of the NF- $\kappa$ B subunit p65 to cytoplasmic IBs is a conserved**  
427 **mechanism of orthopneumovirus immunomodulation**

428 Having established structural and functional similarity between bRSV and hRSV IBs,  
429 we finally examined the regulation and sub-cellular localisation of the NF- $\kappa$ B subunit  
430 p65 in hRSV infected cells. Beginning with the NF- $\kappa$ B luciferase reporter assay we  
431 uncovered a pattern of signalling inhibition similar to bRSV. Infection with hRSV in the  
432 presence of the NF- $\kappa$ B reporter did not lead to robust activation when compared to  
433 mock infected cells, highlighting a lack of activation of this pathway in infected cells  
434 (Fig 7A, black bars). Again, similar to bRSV, infected 293T cells (24 h with hRSV)  
435 which were stimulated for 6h with hTNF $\alpha$  induced significantly less NF- $\kappa$ B  
436 transactivation, when compared to equivalently treated mock-infected cells (Fig 7A,  
437 grey bars). This correlated well with an examination, by IF, of hRSV replication in Vero  
438 cells, with and without hTNF $\alpha$  treatment, where again we did not observe significant  
439 levels of p65 nuclear translocation (Fig 7B). Indeed, as observed in bRSV infected  
440 cells, p65 was recruited into intra-cytoplasmic puncta. These puncta were  
441 subsequently shown to be synonymous with viral IBs (Fig 7C) in a set of experiments  
442 which also confirmed that IB formation and the recruitment of p65 is host cell  
443 independent. bRSV or hRSV infected MDBK (bovine) or Hep2 (human) cells  
444 demonstrated the presence of p65-containing IBs in all scenarios, highlighting that the  
445 mechanisms underpinning RSV IB formation, and the sequestration of p65 to these  
446 bodies, are likely highly conserved (Fig 7C). We concluded this examination of host-  
447 range specificity with a more physiologically relevant model of the human bronchial  
448 epithelium, BEAS-2B cells, which are derived from normal human tissues taken  
449 following autopsy of non-cancerous individuals, identifying again the formation of IBs  
450 and sequestration of p65, regardless of RSV species. Finally, we confirmed that IB-  
451 like structures formed by ectopic hRSV N and P co-expression recruited p65 to their  
452 core (Fig 7D). Taken together, these data indicate that the formation of IBs during viral  
453 replication, together with the sequestration of the transcription factor NF- $\kappa$ B subunit  
454 p65 to these bodies, is a common feature of orthopneumoviruses.

455 **Discussion**

456 Recognition of viral pathogen-associated molecular patterns (PAMPs) by RIG-I or  
457 MDA-5 can lead to activation of NF- $\kappa$ B transcription factors through the IKK complex  
458 or IRFs through TBK-1/IKK $\epsilon$  [9, 11, 48]. Activation of these innate responses is



Jobe et al., 2020

459 essential for inducing a robust adaptive response, firstly to clear viral infections and  
460 secondly to elicit the establishment of a memory response [4, 48]. However, in vivo  
461 the various immune-evasion strategies employed by RSV combine to generate only a  
462 short-lived response [4, 19, 20, 23, 48]. For instance, there is strong evidence that the  
463 downregulation of key signalling molecules by the NS proteins suppresses IRF3  
464 activation and type I IFN induction [17-20, 22, 23], although interestingly we did see  
465 significant IRF3 nuclear translocation in our infected cells. As a key innate immune  
466 pathway, NF- $\kappa$ B signalling is often a target for viral antagonism; however, to date RSV  
467 modulation of its activation has remained less well defined. Although RSV lacking the  
468 *SH* gene was shown to enhance NF- $\kappa$ B activation, the exact mechanisms employed  
469 are unclear [14, 15, 49, 50]. To address this, we monitored NF- $\kappa$ B p65 activation in  
470 RSV-infected cells at multiple steps in the signalling pathway: I $\kappa$ B $\alpha$  degradation, p65  
471 phosphorylation (at Ser536), p65 nuclear translocation, and more broadly NF- $\kappa$ B  
472 transactivation. We present a novel mechanism of immune evasion wherein RSV  
473 infection results in the sequestration of the NF- $\kappa$ B subunit p65 into viral inclusion  
474 bodies (Fig 3B), a process which is independent of the known RSV immunomodulatory  
475 proteins, NS1, NS2 and SH (Fig 3F). We also demonstrate that as a result, activation  
476 of NF- $\kappa$ B p65 is suppressed in infected cells, even with exogenous TNF $\alpha$  stimulation  
477 (Fig 1). Although small IBs were observed as early as 6 h p.i. ( $\leq 2.5 \mu\text{m}^2$ ) these did not  
478 colocalise with detectable levels of p65 (Fig 3E). This may reflect a technical limitation  
479 of our IF, or alternatively that IBs need to grow in size before they can begin to  
480 sequester p65. It remains to be determined if p65 is actively recruited to IBs by viral  
481 proteins or if its sequestration is a result of the IB's position in the cell and that it  
482 captures p65 by an indirect mechanism, perhaps involving trafficking. Interestingly, the  
483 lack of p65 activation prior to IB formation and p65 aggregation, highlights that RSV  
484 may employ additional mechanisms for NF- $\kappa$ B inhibition which remain  
485 uncharacterised. From a wider perspective, this mechanism of immunomodulation  
486 might be a common strategy utilised by RSV and other viruses that induce IB  
487 formation. MAVS and MDA5 were similarly both found to be recruited into RSV IBs as  
488 a mechanism of suppressing IFN signalling [24]. Similarly, p38 MAPK and OGT  
489 sequestration into RSV IBs suppressed MAPK-activated protein kinase 2 signalling  
490 and stress granule formation, respectively, enhancing virus replication [25]. Whether  
491 viruses such as Ebola, Nipah or rabies adopt similar mechanisms of  
492 immunomodulation remains to be determined.

Jobe et al., 2020

493 From a mechanistic perspective our results also showed that the N and P proteins are  
494 essential for the formation of bRSV IBs. As has been reported for rabies [28] and  
495 measles [30] viruses, ectopic expression of these proteins resulted in the formation of  
496 IB-like structures (Fig 6A and 7D). These were mostly spherical and at 24 h post  
497 transfection, measured up to  $6.9 \mu\text{m}^2$  which is considerably less than the conventional  
498 IBs observed in infected cells. We hypothesise that both pseudo-IBs and viral IBs form  
499 by biomolecular condensation, but that their maturation into larger structures is  
500 dependent on other factors present only in infected cells. That these pseudo-IBs could  
501 also recruit p65 suggested a direct interaction between p65 and RSV N or P, which  
502 we confirmed by co-IP (Fig 6B). Interestingly, our IF data was somewhat contradictory,  
503 with the staining patterns and line intensity profiles showing p65 concentrated in the  
504 middle of IBs with N and P at the periphery, separating the IB contents from the  
505 cytoplasm. It is possible that exchange of biomolecules across the boundary, e.g.  
506 during the sequestration of p65, may require transient N or P interactions. Intriguingly,  
507 Lifland et al. also suggested MAVS and MDA-5 are recruited into IBs by interacting  
508 with N and P in a macromolecular complex [24]. We propose that this recruitment may  
509 involve low-affinity interactions with N and/or P and that maintenance within the IB is  
510 enhanced by the same physicochemical properties of the IBs which enable them to  
511 induce LLPS, namely macromolecular-macromolecular interactions. The RSV P  
512 protein has been shown to bind and recruit M2-1 to IBs, potentially through intrinsically  
513 disordered regions within P that allow it to form multiple interactions [51]. Although  
514 further work is required to identify the exact mechanism of p65, MAVS, MDA5 etc.  
515 recruitment into IBs, we postulate the physicochemical properties of these proteins  
516 may also be an important factor.

517 Electron micrograph analysis of our RSV IBs showed greater electron density in the  
518 IBs, when compared to the cytoplasm, a characteristic of biomolecular condensates  
519 (Fig 5A). These data also highlighted the structural complexity of the phase-separated  
520 structure. Although we observed some association with the ER and RER, RSV IBs  
521 were not membrane bound, unlike rabies virus negri-bodies which acquire a  
522 membrane boundary later in infection, presumably derived from the ER [28, 39].  
523 Interestingly, our CLEM analysis confirmed previous IF data from the field that the IB  
524 boundary is surrounded by N protein (Fig 5D). A debate remains in the field as to  
525 whether this is an artefact of disrupted antibody epitope accessibility to N, since GFP

Jobe et al., 2020

526 tagged N proteins were shown to have a diffuse pattern throughout the IB [24];  
527 however, we would only note that we used an antibody developed in-house for this  
528 staining. Nevertheless, the presence of viral RNA associated proteins, N, P and M2-  
529 1, in IBs (Fig 3B and 4C) strongly suggested the presence of RNA replication and  
530 transcription within these structures. Building on previous work for hRSV and rabies  
531 virus [26, 39], we used 5EU incorporation to confirm RNA synthesis in the IBs (Fig 4A  
532 and B). Using fluorescence in situ hybridization (FISH) experiments, Rincheval et al.  
533 showed that genomic RNA colocalised with the hRSV N and P proteins at the  
534 periphery, whilst viral mRNA was found to concentrate in IBAGs, transient sites of  
535 mRNA storage [26]. Our data showed the formation of similar structures, confirming  
536 IBAGs are found in multiple orthopneumoviruses; however, there was no conclusive  
537 colocalisation with p65. However, this sequestered cellular protein did localise to  
538 distinct intra-IB bodies (Fig 4B and C), raising the intriguing possibility that multiple  
539 microdomains exist within what is, by TEM, an apparently uniform granular  
540 biomolecular condensate.

541 In summary our data shows that RSV IBs are highly ordered structures performing  
542 multiple roles in the virus lifecycle including the compartmentalisation of virus  
543 replication and transcription and the sequestration of cellular proteins involved in the  
544 antiviral response. This mechanistic characterisation is potentially applicable to other  
545 negative sense RNA viruses that have been shown to form IBs during replication.

## 546 **Materials and Methods**

547 **Cells and viruses.** All cells were cultured at 37°C in a 5% CO<sub>2</sub> atmosphere. MDBK  
548 (Madin-Darby bovine kidney), Vero (monkey kidney epithelial), 293T (human  
549 embryonic kidney) and Hep-2 (human epithelial type 2) cells were obtained from the  
550 Pirbright Institute Central Services Unit and maintained in Dulbecco's Modified Eagle's  
551 Medium (DMEM) supplemented with 10% heat inactivated foetal calf serum (FCS;  
552 TCS Biologicals), sodium pyruvate (Gibco), penicillin and streptomycin (Sigma). Beas-  
553 2B (human bronchial epithelial) cells (ATCC) were cultured in LHC basal medium  
554 (ThermoFisher) supplemented with 10% FCS, penicillin and streptomycin.

555 Wild-type recombinant (r) bRSV and deletion mutant rbRSVs  $\Delta$ SH,  $\Delta$ NS1,  $\Delta$ NS2, and  
556  $\Delta$ NS1/2 were produced by reverse genetics from rbRSV strain A51908 variant  
557 Atue51908 (GenBank accession no. AF092942) [18, 40, 52]. These were propagated

Jobe et al., 2020

558 in Vero cells and hRSV subtype A (A2 strain) grown in Hep-2 cells. All viruses were  
559 further purified from total cell lysates using polyethylene glycol (molecular weight,  
560 8,000) precipitation and discontinuous sucrose gradient centrifugation.

561 **Plasmids and transfections.** All viral gene sequences were derived from bRSV  
562 A51908 (GenBank accession NC\_038272) and hRSV A2 (GenBank accession  
563 KT992094). Expression plasmids (pcDNA3.1) encoding codon-optimised *N* genes at  
564 KpnI-BamHI sites referred to as pN were purchased from Bio Basic Inc. Full length *P*  
565 genes were amplified by reverse transcriptase PCR using gene-specific primers and  
566 Superscript II reverse transcriptase (Invitrogen). These were then cloned into  
567 pcDNA3.1 at KpnI-BamHI sites and designated pP. The p65 open reading frame  
568 (ORF) was amplified from pcDNA3.1-HA-p65 (kindly provided by Carlos Maluquer de  
569 Motes, Uni. Of Surrey) and inserted at the HindIII-BamHI sites of pcDNA3.1;  
570 designated pP65. All sequences were confirmed by conventional sanger sequencing.  
571 Plasmids were transfected into cells using TransIT-X2 (GeneFlow).

572 **Antibodies and drugs.** Mouse monoclonal antibodies raised against bRSV F  
573 (mAb19), N (mAb89), P (mAb12), M (mAb105) and M2-1 (mAb91) were previously  
574 described [53, 54]. Rabbit polyclonal anti-bRSV SH antibody was purchased from  
575 Ingenasa. Rabbit anti-NF- $\kappa$ B p65 (8242) antibody; rabbit anti-IRF3 (11904); rabbit anti-  
576 phospho-NF- $\kappa$ B p65 (Ser536; 3033); mouse anti-I $\kappa$ B $\alpha$  (4814); and rabbit anti-GAPDH  
577 (5174) were obtained from Cell Signaling Technology. Mouse anti-G3BP-1 was  
578 obtained from BD Biosciences. Secondary horse-radish peroxidase-linked antibodies  
579 were obtained from CST and Alexa Fluor secondary antibodies from Life  
580 Technologies. Recombinant hTNF $\alpha$  (CST), poly(I:C) (InvivoGen), sodium arsenite  
581 (Sigma), and actinomycin D (Sigma) were purchased from the indicated suppliers.

582 **Confocal immunofluorescence microscopy.** Cells were fixed with 4%  
583 paraformaldehyde (PFA; Sigma) in PBS for 15 mins, permeabilised with 0.2% Triton  
584 X-100 in PBS for 5 mins and blocked with 0.5% bovine serum albumin (BSA) (Sigma)  
585 in PBS. Cells were then incubated with the indicated primary antibodies overnight at  
586 4°C. They were then washed and incubated with Alexa Fluor secondary antibodies  
587 (Life Technologies) for 1 hr at room temperature. Cells were then washed and  
588 mounted with Vectashield (Vector labs) containing DAPI for nuclei staining.  
589 Fluorescence was imaged on a Leica TCS SP5 confocal microscope using 405nm,

Jobe et al., 2020

590 488nm and 568nm laser lines for the appropriate dyes and a 63X oil immersion  
591 objective.

592 **Quantitation of bRSV induced p65 puncta and IBs.** Mock or bRSV-infected (at an  
593 MOI of 1) MDBK cells were fixed in 4% PFA (Sigma) at 6, 16 and 24 h p.i., and labelled  
594 according to the described immunofluorescence method. Multiple Z-sections, 0.5  $\mu$ m  
595 apart, were taken for each cell, by confocal microscopy and max intensity Z-stacks of  
596 8 planes made using the Leica LAS AF Lite software. Quantifications of N and p65  
597 positive structures were performed using the area region of interest analysis tool.  
598 GraphPad Prism 7 was used to perform parametric one-way analysis of variance  
599 (ANOVA) and Tukey's multiple comparison tests. ImageJ was also used to make 3D  
600 projections of 9 images 0.9  $\mu$ m apart.

601 **Luciferase reporter assay.**  $2 \times 10^5$  293T cells seed into 24 well plates a day prior  
602 were mock infected, infected with bRSV or hRSV at an MOI of 1. 6 h later, cells were  
603 co-transfected with 100 ng NF- $\kappa$ B FLuc reporter which expresses the firefly luciferase  
604 gene under the control of five NF- $\kappa$ B repeated transcription factor binding sites and 10  
605 ng TK-ren control plasmid (both kindly provided by Gareth Brady; The Uni. Of Dublin)  
606 using Transit-X2 (Geneflow). 24 hours later, cells were stimulated with 20 ng/mL  
607 hTNF $\alpha$  for 16 hours or were left untreated. Cells were then lysed with reporter lysis  
608 buffer (Promega) and lysates used to determine firefly and renilla luciferase activities  
609 on a Glomax luminometer using luciferase assay system (Promega) and coeleterazine  
610 (Promega), respectively. Firefly data was normalised to renilla which was used as an  
611 internal control of transfection. GraphPad Prism 7 was used to perform parametric  
612 one-way analysis of variance (ANOVA) and Tukey's multiple comparison tests.

613 **Western blot analysis.** Following virus infection and stimulation, growth media was  
614 removed from cells and cell extracts prepared by lysis in SDS sample buffer (Bio-Rad)  
615 supplemented with  $\beta$ -mercaptoethanol (Sigma), complete mini-EDTA-free protease  
616 inhibitors (Roche) and 1 mM sodium orthovanadate (New England Bio-Labs). Lysates  
617 were then boiled for 5 mins and 30  $\mu$ l resolved by SDS PAGE on a 12% polyacrylamide  
618 gel and proteins transferred to polyvinylidene difluoride (PVDF) membranes  
619 (ThermoScientific). After blocking for 1 hr with 5% dry semi-skimmed milk in 0.1% PBS  
620 Tween 20 (PBS-T) membranes were washed with PBS-T and incubated with primary  
621 antibodies overnight at 4°C. After washing, the membranes were incubated with the



Jobe et al., 2020

622 corresponding horseradish peroxidase-conjugated secondary antibodies (CST).  
623 Protein bands were detected using Clarity Western ECL substrate (Bio-Rad) and  
624 imaged with Bio-Rad ChemiDoc™ MP Imaging System.

625 **5-ethynyl uridine (5EU) labelling.** Infected cells growing on coverslips were  
626 incubated with or without medium supplemented with 20 µg/ml actinomycin D (Act D)  
627 to inhibit cellular transcription for 1 h. Cells were then incubated with medium  
628 containing 1 mM 5EU and 20 µg/ml Act D for another hour. Medium was then washed  
629 off and cells fixed in 4% PFA for 15 mins. Cells were then washed with PBS and  
630 permeabilized with 0.2% Triton X-100 for 5 mins. These were both supplemented with  
631 0.125 U/ml RNase inhibitor (Promega). Incorporated 5EU was labelled using the Click-  
632 IT RNA Imaging Kit (Invitrogen) following the manufacturer's protocol. Following that,  
633 immunofluorescence staining was done as described above.

634 **TEM.** Cells seeded onto Thermanox coverslips (Thermo Scientific) were fixed at 24 h  
635 and 48 h p.i in phosphate buffered 2% glutaraldehyde (Agar Scientific) for 1 hour  
636 followed by 1 hour in aqueous 1% osmium tetroxide (Agar Scientific). Following  
637 dehydration in an ethanol series; 70% for 30 min, 90% for 15 min and 100% three  
638 times for 10 min, a transitional step of 10 min in propylene oxide (Agar Scientific) was  
639 undertaken before infiltration with 50:50 mix of propylene oxide and epoxy resin (Agar  
640 Scientific) for 1 hour. After a final infiltration of 100% epoxy resin for 1 hour, the  
641 samples were embedded and polymerised overnight at 60°C. 80µm thin sections were  
642 cut, collected onto copper grids (Agar Scientific) and grid stained using Leica EM AC20  
643 before being imaged at 100kV in a FEI Tecnai 12 TEM with a TVIPS F214 digital  
644 camera.

645 **CLEM.** Cells seeded onto gridded glass coverslips (MatTek) were fixed at 24 h and  
646 48 h p.i in 4% PFA (Sigma) and labelled according to the described  
647 immunofluorescence method. Selected grid squares were imaged on a Leica TCS  
648 SP8 confocal using 405nm, 488nm and 568nm laser lines for the appropriate dyes.  
649 The cells were then fixed in phosphate buffered 2% glutaraldehyde (Agar Scientific)  
650 for 1 hour followed by 1 hour in aqueous 1% osmium tetroxide (Agar Scientific).  
651 Following 15min in 3% uranyl acetate (Agar Scientific), the cells were dehydrated in  
652 an ethanol series; 70% for 30 min, 90% for 15 min and 100% three times for 10 min.  
653 After infiltration of 100% epoxy resin for 2 hours, the samples were embedded and



Jobe et al., 2020

654 polymerised overnight at 60°C. The glass coverslips were removed with liquid nitrogen  
655 and the appropriate grid squares located. 80µm thin sections were cut, collected onto  
656 copper grids (Agar Scientific) and grid stained using Leica EM AC20. The specific cells  
657 imaged in the confocal were identified and imaged at 100kV in a FEI Tecnai 12 TEM  
658 with a TVIPS F214 digital camera.

659 **Co-Immunoprecipitation.** 1 x10<sup>5</sup> 293T cells cultured overnight in 12-well plates were  
660 transfected with pcDNA3.1-empty vector (pEV) or pcDNA3.1-p65 (pP65) using  
661 TransIT-X2 (GeneFlow). 24 h later, cells were infected with bRSV at MOI 1 or mock  
662 infected and incubated for another 24 h. Cells were then lysed on ice with RIPA lysis  
663 buffer (EMB Millipore) and cell debris removed by centrifugation. Cell lysates pre-  
664 cleared with protein A coated magnetic beads (CST) were incubated with rabbit anti-  
665 p65 antibodies overnight at 4°C. Lysates were then incubated with protein A coated  
666 magnetic beads for 20 mins at room temperature with rotation. Following five washes  
667 with PBS-T, immunoprecipitates were eluted with Laemmli sample buffer and  
668 subjected to SDS-PAGE and western blot analysis as already described.

669 **Ethics statement:** This research did not use any primary human or animal tissue.  
670 BEAS-2B cells were procured from ATCC.

671 **Author contributions:** FJ performed all experiments, apart from the EM and CLEM  
672 which were performed by JS and PH. EG was involved in training FJ. FJ and DB  
673 analysed the data, designed the experiments, compiled the figures and wrote the  
674 manuscript.

675 **Acknowledgements.** This work was supported by a UK Research and Innovation  
676 (UKRI; [www.ukri.org](http://www.ukri.org)) Medical Research Council (MRC) New Investigator Research  
677 Grant to DB (MR/P021735/1) as well as a UKRI Biotechnology and Biological  
678 Sciences Research Council (BBSRC, [www.ukri.org](http://www.ukri.org)) Institute Strategic Programme  
679 Grant (ISPG) to The Pirbright Institute and DB (BBS/E/I/00007034 and  
680 BBS/E/I/00007030). The funders had no role in study design, data collection and  
681 analysis, decision to publish, or preparation of the manuscript. We would like to  
682 acknowledge the support of Geraldine Taylor (The Pirbright Institute), Ursula Buchholz  
683 (NIAID, NIH), Karl-Klaus Conzelmann (Max-von-Pettenkofer Institut), Andrew  
684 Broadbent (The Pirbright Institute), Gareth Brady (Trinity College, Dublin), Carlos

Jobe et al., 2020

685 Maluquer de Motes (University of Surrey) and Helena Maier (The Pirbright Institute)

686 for the provision of valuable reagents, recombinant viruses and technical advice.

687

688 **Figures:**

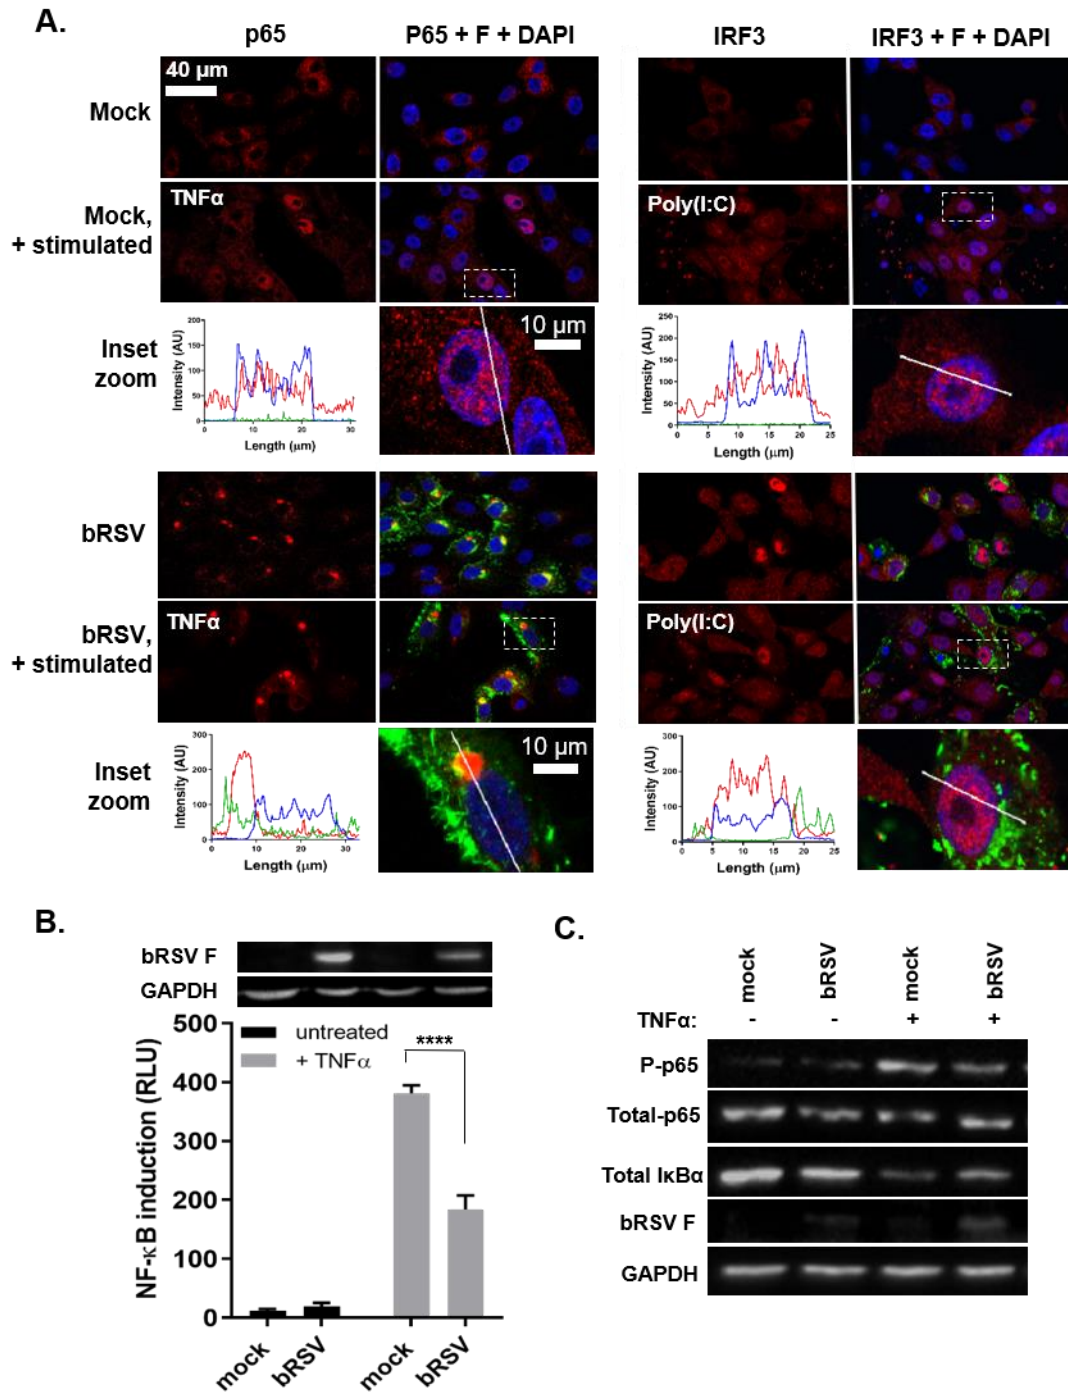

689

690 **Figure 1. bRSV infection induces IRF3, but not NF-κB, nuclear translocation. (A)**  
 691 Vero cells, uninfected (mock), or infected with bRSV at an MOI of 1 for 24 h, were left  
 692 untreated, stimulated with 20 ng/ml hTNFα for 30 mins or transfected with 2.5 μg/ml  
 693 poly(I:C) and incubated for 6 hrs at 37°C. Cells were then fixed and immunostained  
 694 with anti-RSV F (green) and anti-NF-κB p65 or anti-IRF3 (red) antibodies. Cell nuclei  
 695 were stained with DAPI (blue) and images obtained using a Leica TCS SP5 confocal

Jobe et al., 2020

696 microscope. The boxed areas are shown magnified in the panels below (inset zoom).  
697 Graphs show fluorescent line intensity profiles along the respective white lines within  
698 these inset zooms. **(B)** 293T cells were mock infected or infected with bRSV at an MOI  
699 of 1. At 6 h p.i., cells were transfected with 100 ng NF- $\kappa$ B FLuc reporter and 10 ng TK-  
700 renilla luciferase and incubated at 37°C. At 18 h p.t., cells were left untreated or  
701 stimulated for 16 h with 20 ng/ml hTNF $\alpha$ . Cells were then lysed and analysed for firefly  
702 and renilla luciferase activities. Graph depicts means  $\pm$  SD of three replicates from the  
703 same experiment. As controls, the levels of RSV F and GAPDH were analysed by  
704 western blotting on a fourth replicate. Statistical significance determined by ANOVA  
705 as described in the methods, \*\*\*\* $p < 0.0001$ . **(C)** Vero cells mock infected or infected  
706 with bRSV at an MOI of 2 for 24 h were left untreated or stimulated with 20 ng/ml  
707 hTNF $\alpha$  for 10 mins. Cells were then lysed and analysed by western blotting for  
708 phosphorylation of p65 using phospho-specific forms of the antibody, total p65, I $\kappa$ B $\alpha$   
709 and RSV F. GAPDH was detected as a loading control.

Jobe et al., 2020

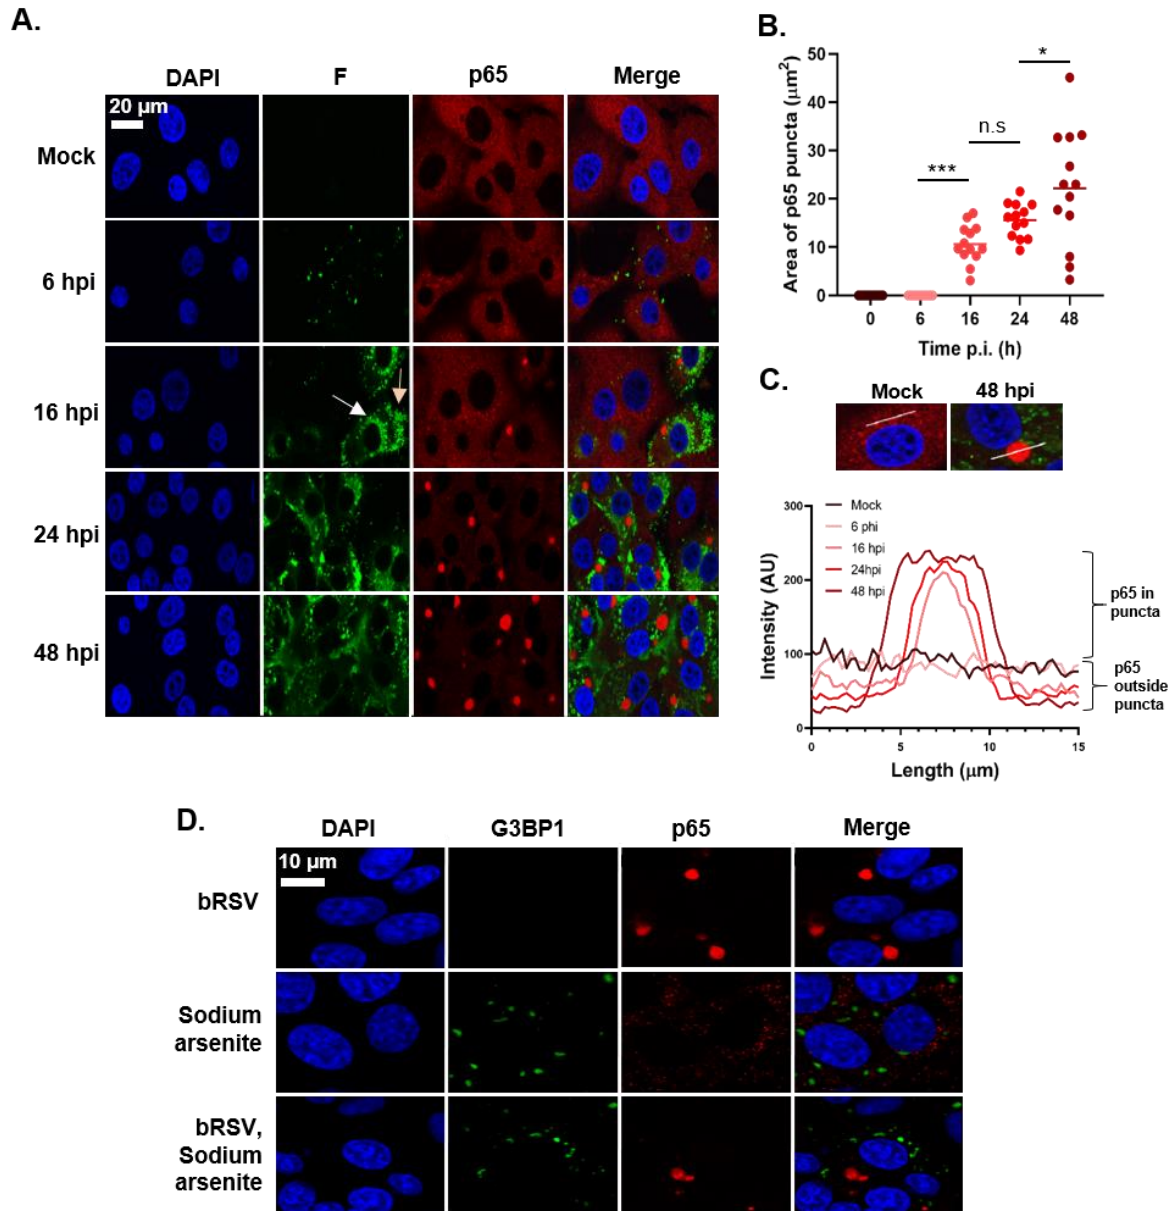

710

711 **Figure 2. BRSV replication induces the recruitment of the NF- $\kappa$ B subunit p65**

712 **into intra-cytoplasmic bodies distinct from stress granules. (A)** MDBK cells were

713 mock infected or infected with bRSV. At the indicated times p.i. cells were fixed and

714 immuno-stained with anti RSV F (green) and anti-NF- $\kappa$ B p65 (red) antibodies. Nuclei

715 were stained with DAPI (blue) and images obtained using a Leica TCS SP5 confocal

716 microscope. **(B and C)** Quantification of p65 puncta in A obtained using the quantify

717 tool of Leica LAS AF Lite software as described in the methods. **(B)** Surface area of

718 thirteen p65 puncta per time point and mean area are indicated. Statistical significance

719 determined by ANOVA as described in the methods, n.s: non-significant; \* $p < 0.05$ ;

720 \*\*\* $p < 0.001$ . **(C)** Graph showing the line intensity profiles along chosen 15  $\mu\text{m}$  lines of

721 interest (example micrographs: 15  $\mu\text{m}$  drawn across a puncta, or, across the

Jobe et al., 2020

722 cytoplasm in mock cells) of an average of five puncta per time point. **(D)** Vero cells  
723 were infected with bRSV or mock infected. At 24 h p.i., cells were treated with 500  $\mu$ M  
724 Sodium arsenite or mock treated for 1 hr. Cells were then fixed and immuno-stained  
725 with anti-G3BP1 (green) and anti-NF- $\kappa$ B p65 (red) antibodies. Nuclei were stained with  
726 DAPI (blue) and images obtained using a Leica TCS SP5 confocal microscope.



Jobe et al., 2020

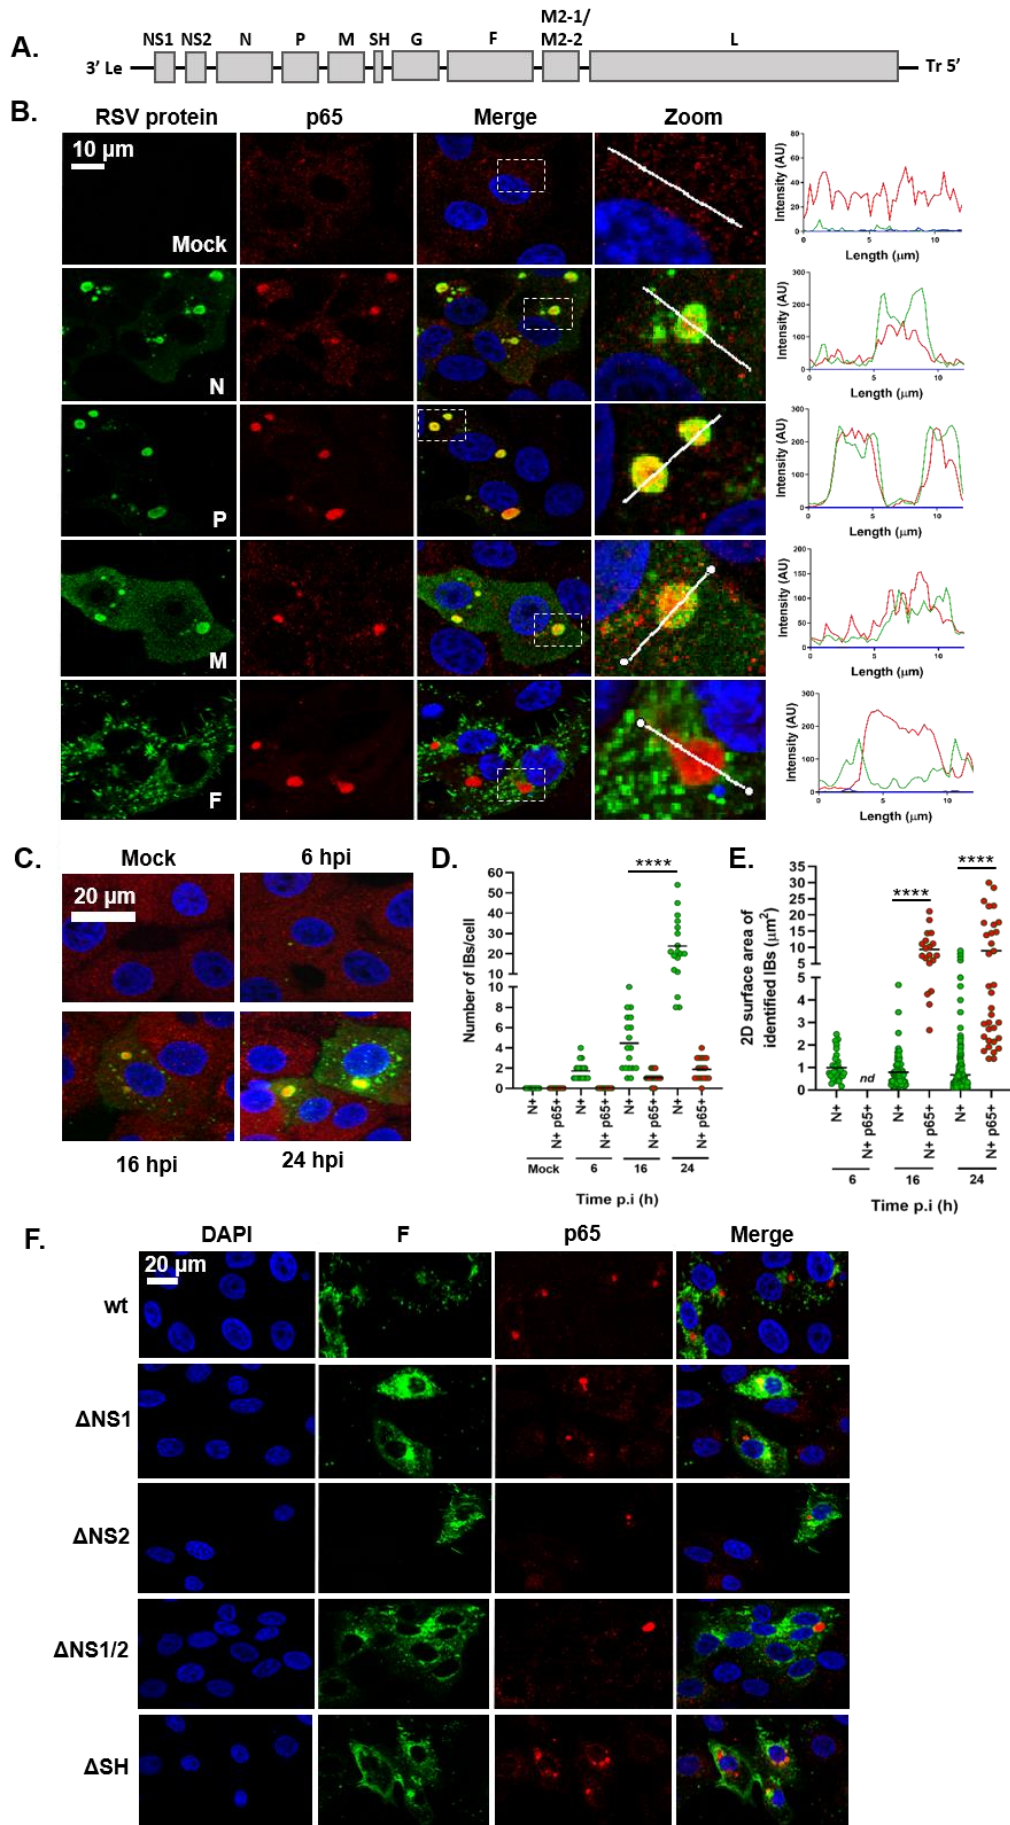

Jobe et al., 2020

728 **Figure 3. The NF- $\kappa$ B subunit p65 co-localises with viral inclusion bodies**  
729 **independently of RSV-encoded immunomodulators. (A)** Schematic depiction of  
730 the bRSV genome showing organisation of the encoded genes. **(B)** Vero cells, mock  
731 infected, or infected with bRSV for 24 h, were fixed and immunostained with rabbit  
732 anti-NF- $\kappa$ B p65 (red) and mouse monoclonal anti-RSV N, P, M or F antibodies (green).  
733 Nuclei were stained with DAPI (blue) and images obtained using a Leica TCS SP5  
734 confocal microscope. Zoom panel shows magnification of IBs boxed in the merge  
735 panel. Graphs shows fluorescent intensity profiles along the indicated white lines  
736 drawn across one or two IBs. **(C)** MDBK cells were mock infected or infected with  
737 bRSV. At the indicated times p.i. cells were fixed and immuno-stained with anti RSV  
738 N (green) and anti-NF- $\kappa$ B p65 (red) antibodies. Images are max intensity z-stacks of  
739 8 planes 0.5  $\mu\text{m}^2$  apart. Cytoplasmic bodies (area  $>0.1 \mu\text{m}^2$ ) from the z-stacks were  
740 quantified in a total of 18 infected cells per time point as detailed in the methods. **(D)**  
741 Number of N and N and p65 positive bodies per cell at the indicated time points. **(E)**  
742 Surface area of identified N and N and p65 positive IBs. Statistical significance  
743 determined by ANOVA as described in the methods, \*\*\*\* $p < 0.0001$ . **(F)** Vero cells were  
744 infected with wt bRSV,  $\Delta\text{NS1}$ ,  $\Delta\text{NS2}$ ,  $\Delta\text{NS1}\Delta\text{NS2}$  or  $\Delta\text{SH}$  bRSV. 24 h p.i., cells were  
745 fixed and immunostained with rabbit anti-NF- $\kappa$ B p65 (red) and mouse anti-RSV F  
746 (green) antibodies. Cell nuclei were stained with DAPI (blue) and images obtained  
747 using a Leica TCS SP5 confocal microscope.

Jobe et al., 2020

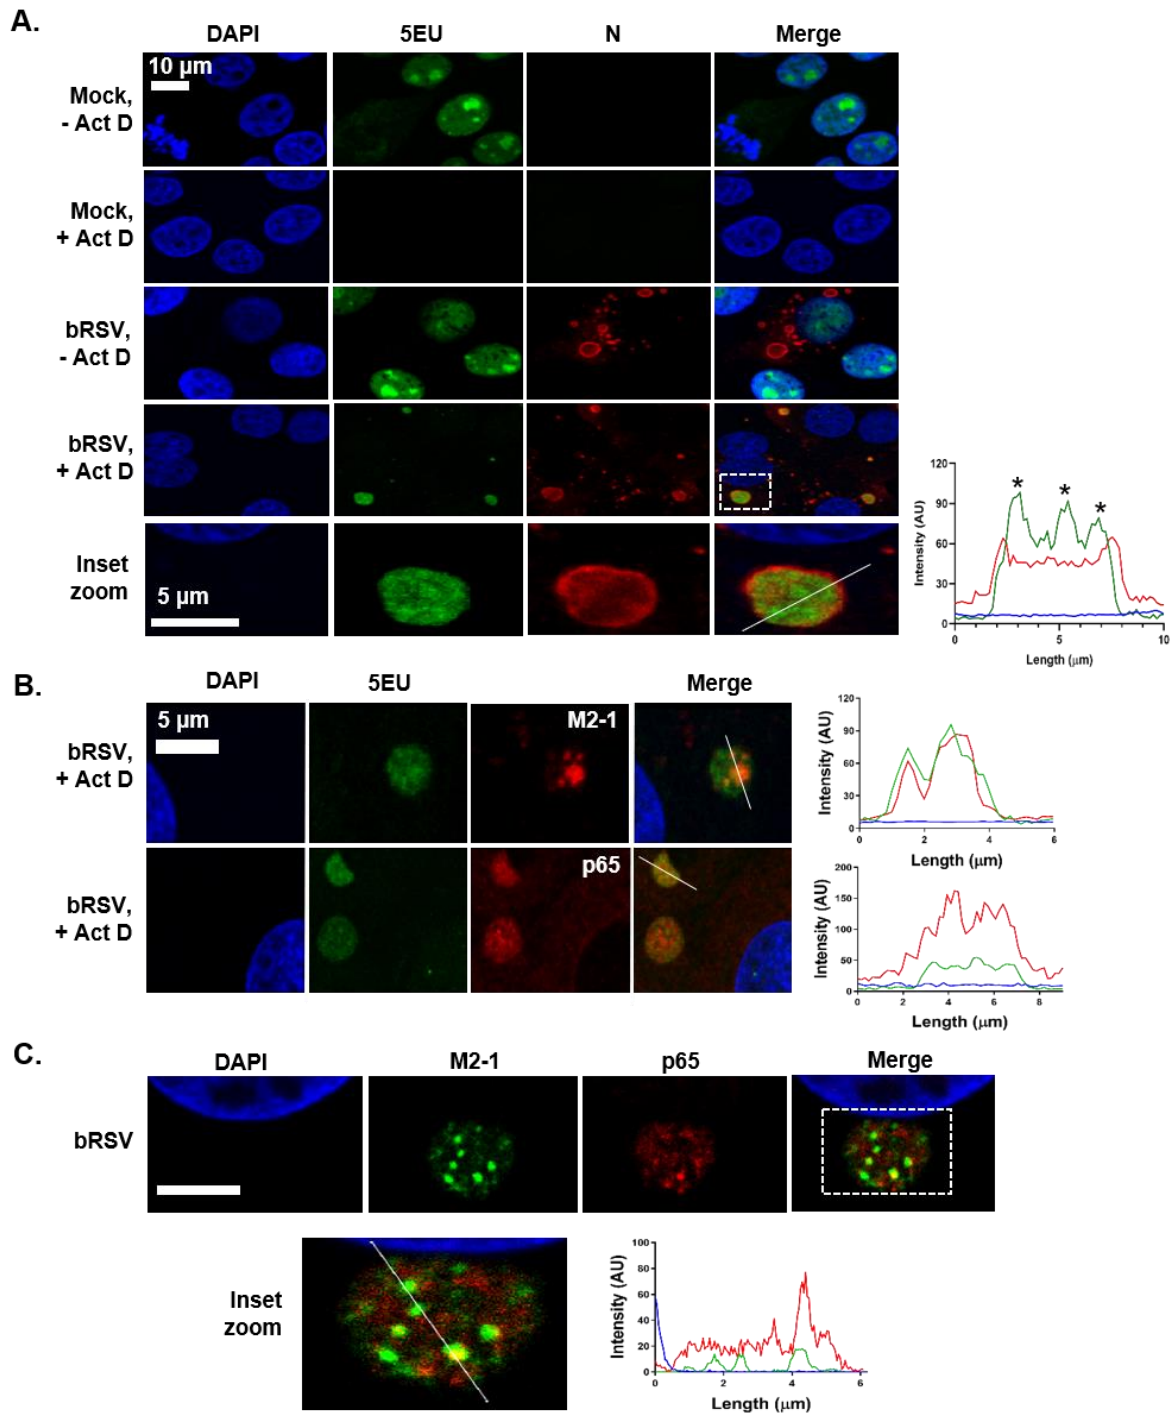

748

749 **Figure 4. bRSV IBs are sites of RNA replication but p65 does not specifically co-**

750 **localise with M2-1 or nascent viral RNA in IB-associated granules (IBAGs). (A)**

751 **and (B) MDBK cells were mock infected or infected with bRSV. 24 h later, cells were**

752 **incubated with vehicle or 20 µg/ml actinomycin D (Act D) for 1 h to inhibit cellular**

753 **transcription. 5-ethynyl uridine (5EU) was then added for another 1 h and the cells**

754 **fixed. 5EU incorporated into newly synthesised RNA was detected using Alexa Fluor**

755 **488-azide (green) as described in the methods. Cells were then immuno-stained with**

Jobe et al., 2020

756 anti-RSV N, M2-1 or anti-NF- $\kappa$ B p65 antibodies (red). Cell nuclei were stained with  
757 DAPI (blue) and images obtained using a Leica TCS SP5 confocal microscope.  
758 Bottom panel of (A) (inset zoom) shows the boxed area (in merge of bRSV, +Act D)  
759 magnified. Graphs show fluorescent intensity profiles along the indicated white lines  
760 drawn across the IBs. Asterisks in A. indicate areas of increased 5EU staining within  
761 the IB. **(C)** Vero cells infected with bRSV for 24 h were fixed and immuno-stained with  
762 rabbit anti-NF- $\kappa$ B p65 (red) and mouse anti-M2-1 (green) antibodies. Cell nuclei were  
763 stained with DAPI (blue) and images obtained using a Leica TCS SP5 confocal  
764 microscope. Bottom panel shows a higher magnification of the boxed area - scale bar  
765 corresponds to 4  $\mu$ m. Graphs shows fluorescent intensity profiles along the indicated  
766 white line.



Jobe et al., 2020

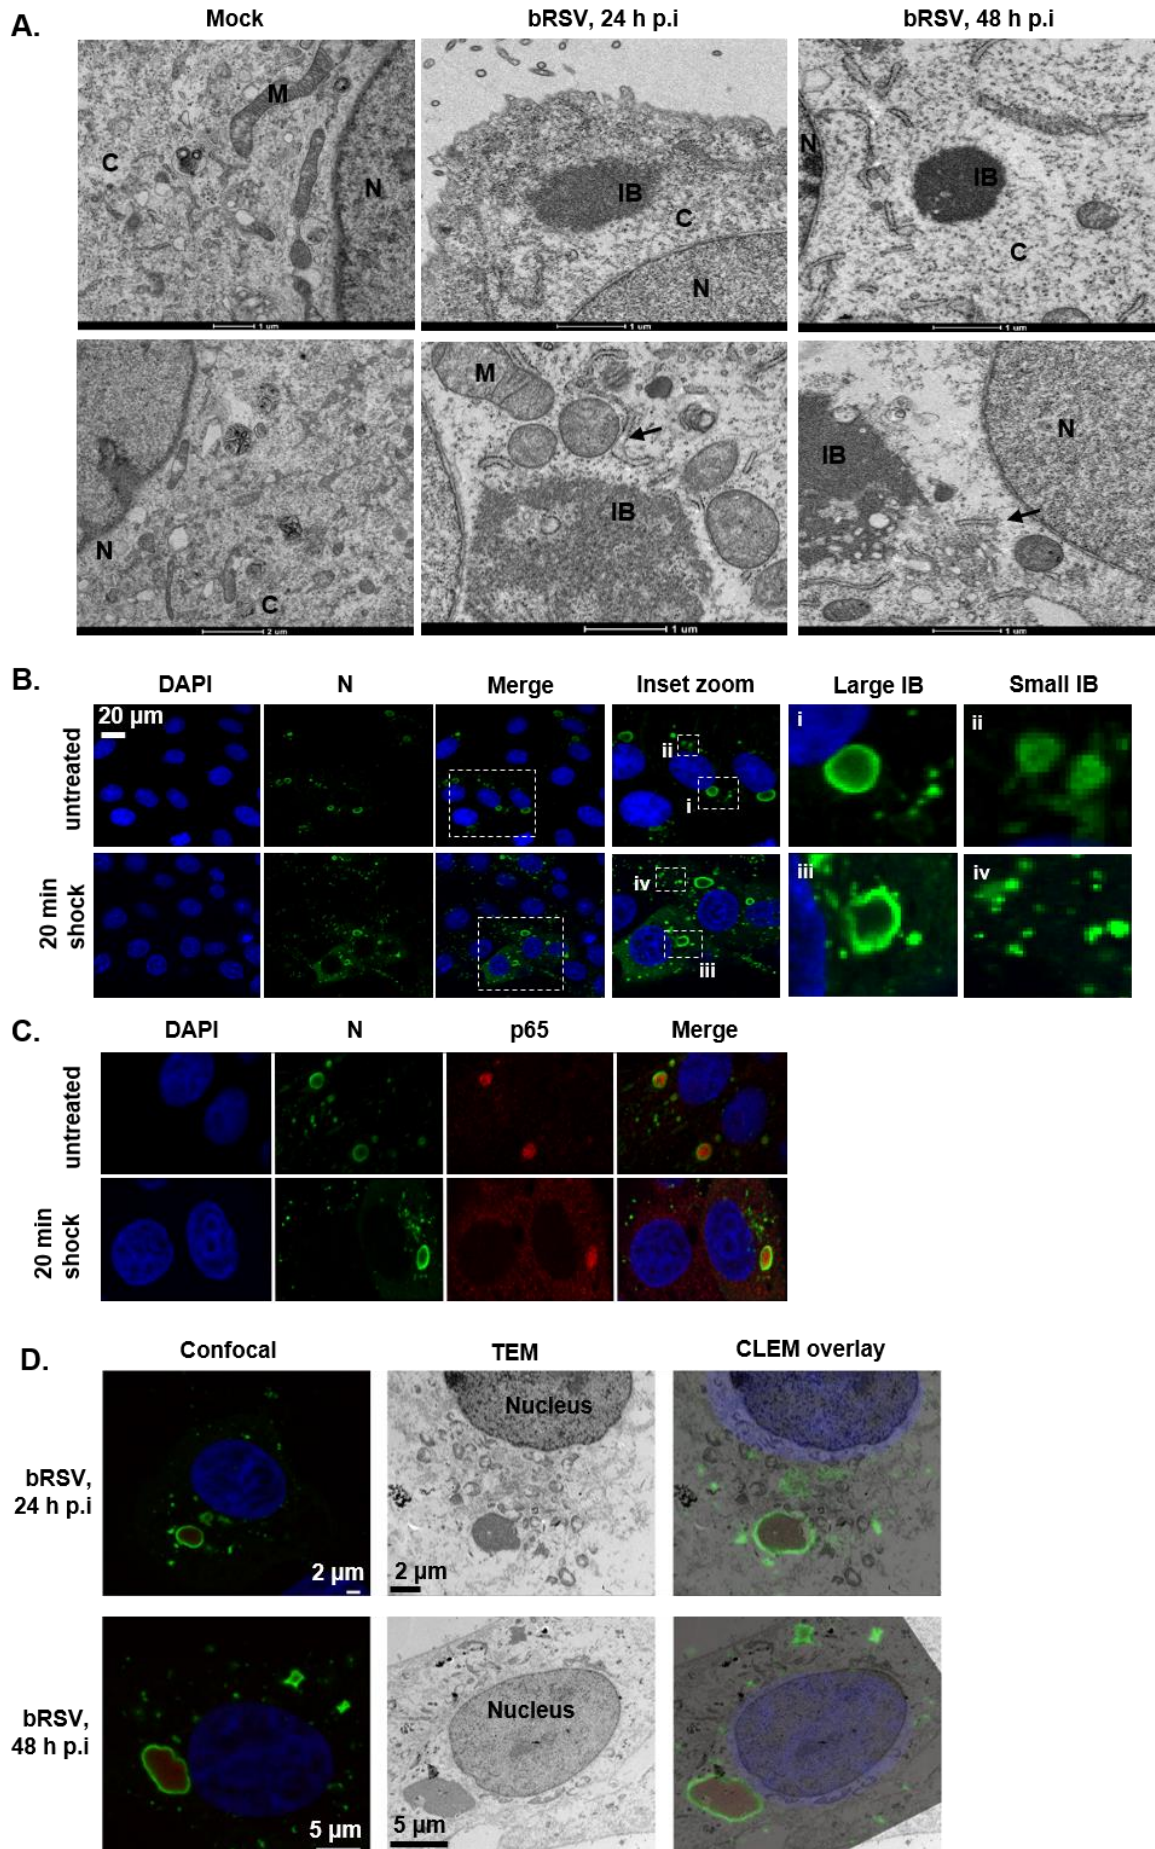

Jobe et al., 2020

768 **Figure 5. bRSV IBs are membraneless liquid organelles.** (A) High power  
769 transmission electron microscopy (TEM) of mock or bRSV infected Vero cells fixed in  
770 glutaraldehyde at 24 and 48 h p.i and prepared for TEM as detailed in the methods.  
771 N, nucleus; M, mitochondria; C, cytoplasm; IB, inclusion body and ER indicated with  
772 black arrow. Two representative images are shown per time point. Scale bars  
773 correspond to 1  $\mu$ m. (B/C) Vero cells were infected with bRSV at an MOI of 1 and  
774 incubated at 37°C for 24 h. Hypotonic shock was applied for 20 mins before the cells  
775 were fixed. Confocal analysis was performed following immuno-staining for bRSV N  
776 (green) and nucleus stained with DAPI (and also p65 for C.). Inset zooms demonstrate  
777 the observed effects of hypotonic shock on large (i and iii) and small (ii and iv) IBs –  
778 representative images shown. (D) Correlative light electron microscopy (CLEM) of  
779 confocal microscopy immunostaining and TEM showing bRSV IBs. Vero cells infected  
780 with bRSV at MOI 1 were fixed at 24 or 48 h p.i., stained with antibodies against RSV  
781 N (green), NF- $\kappa$ B p65 (red) and nuclei stained with DAPI. Following confocal imaging,  
782 cells were fixed in glutaraldehyde, sectioned and visualised by TEM. Confocal (left)  
783 and TEM (middle) images of the same cells were overlaid (right) as CLEM images.

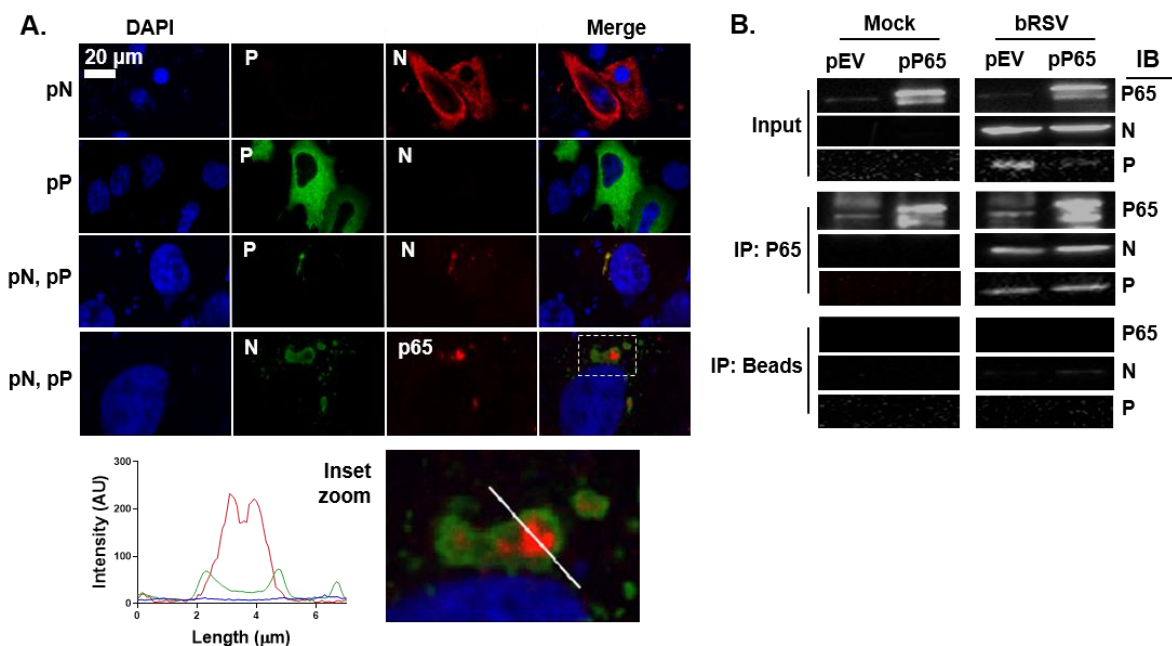

784  
785 **Figure 6. Co-expression of bRSV N and P proteins induces the formation of IB-**  
786 **like structures which can sequester p65.** (A) Vero cells were co-transfected with  
787 equimolar concentrations of plasmids expressing bRSV N (pN) and/or P (pP) proteins  
788 as indicated. Following 24 h incubation, cells were fixed and stained with anti-RSV N  
789 (green/red) and anti-RSV P (green) or anti-NF- $\kappa$ B p65 (red) antibodies. Bottom panel



Jobe et al., 2020

790 shows a higher magnification of the boxed area. Graphs shows fluorescent intensity  
791 profiles along the indicated white line. **(B)** Co-immunoprecipitation of p65. 293T cells  
792 were transfected with plasmids expressing NF- $\kappa$ B p65 (pP65) or empty vector (pEV)  
793 and 6 h later infected with bRSV at MOI 1. At 24 h p.i., cell lysates were  
794 immunoprecipitated (IP) with anti-p65 antibody or beads alone as a control. Pull-  
795 downs were analysed by SDS-PAGE and immuno-blotting (IB) using anti-p65, anti-N  
796 or anti-P antibodies

Jobe et al., 2020

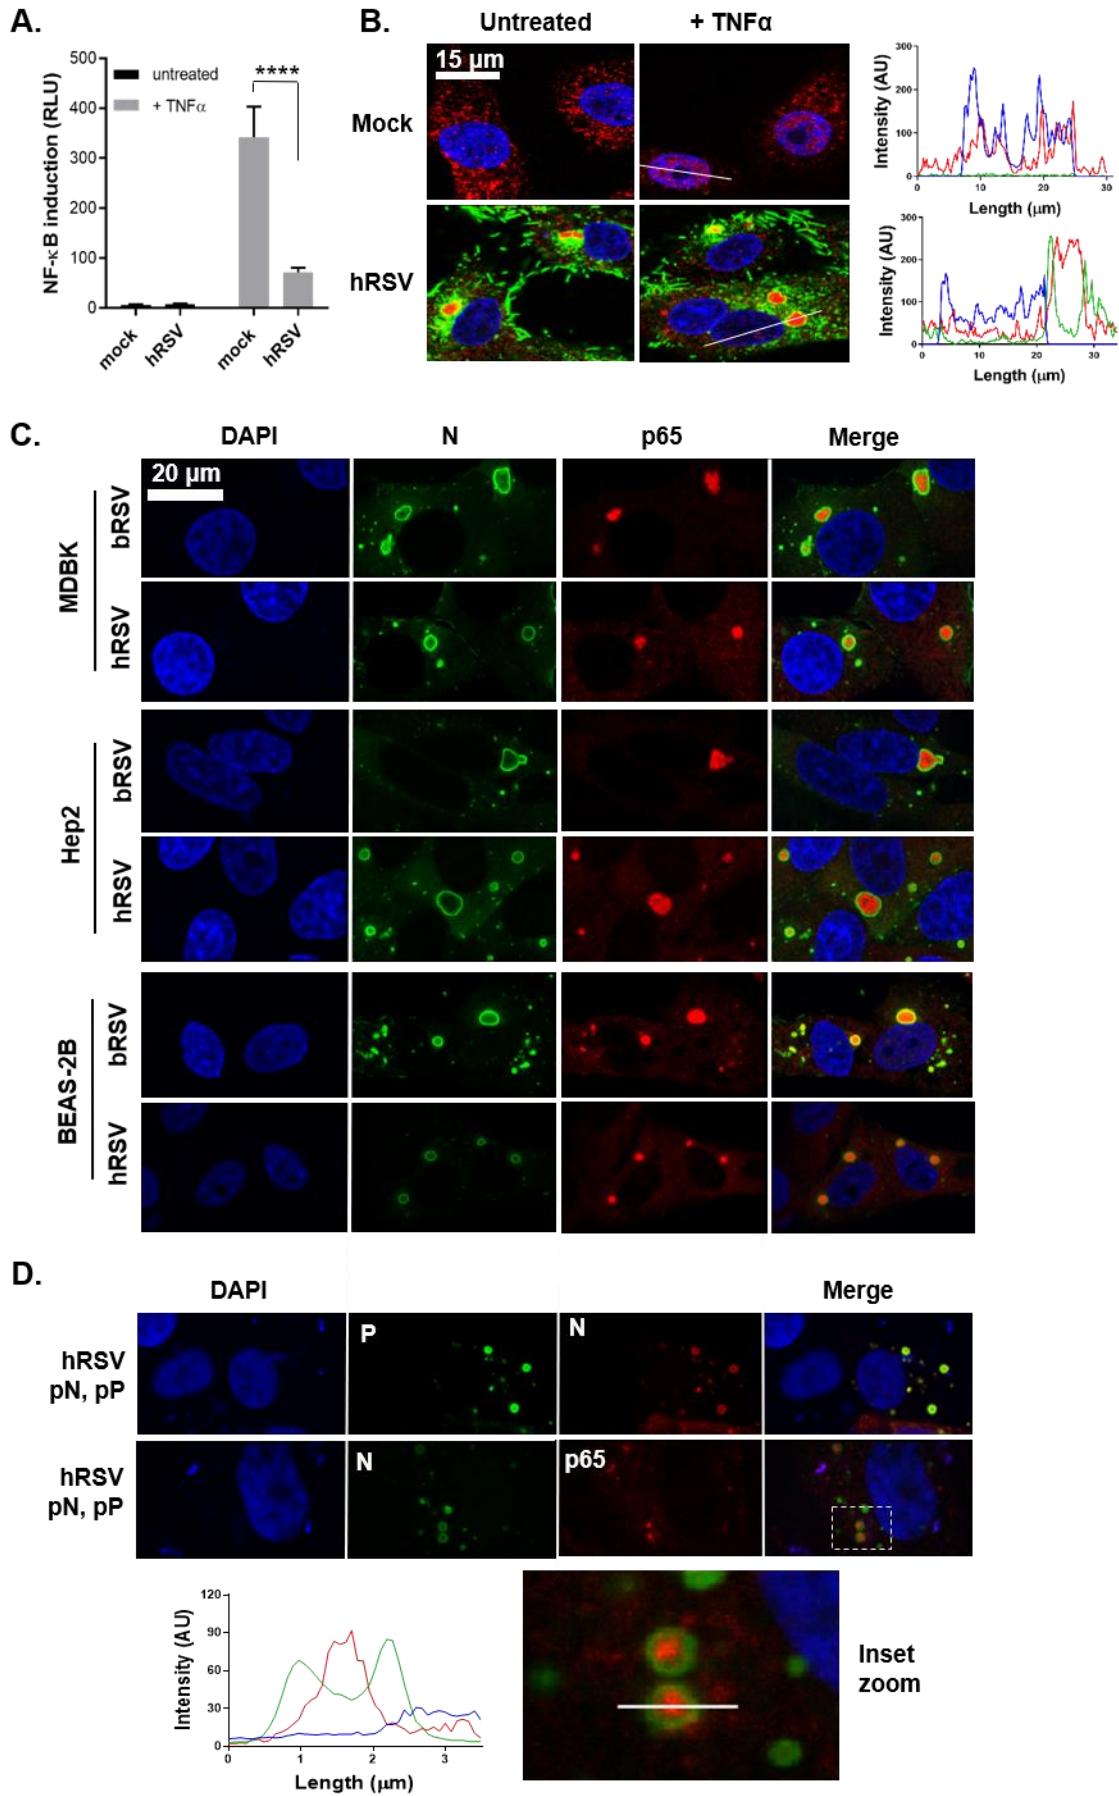

Jobe et al., 2020

798 **Figure 7. The sequestration of the NF- $\kappa$ B subunit p65 to cytoplasmic IBs is a**  
799 **conserved mechanism of orthopneumovirus immunomodulation. (A)** 293T cells  
800 were mock infected or infected with hRSV at an MOI of 1. At 6 h p.i., cells were  
801 transfected with 100 ng NF- $\kappa$ B FLuc reporter and 10 ng TK-renilla luciferase and  
802 incubated at 37°C. At 18 h p.t., cells were left untreated or stimulated for 16 h with 20  
803 ng/ml hTNF $\alpha$ . Cells were then lysed and analysed for firefly and renilla luciferase  
804 activities. Graph depicts means  $\pm$  SD of three replicates from the same experiment.  
805 Statistical significance determined by ANOVA as described in the methods,  
806 \*\*\*\* $p < 0.0001$ . **(B)** Vero cells mock infected or infected with hRSV at an MOI of 1 for  
807 24 h were left untreated or stimulated with 20 ng/ml hTNF $\alpha$  for 30 mins. Cells were  
808 then fixed and immuno-stained with anti-RSV F (green) or anti-NF- $\kappa$ B p65 (red)  
809 antibodies. Cell nuclei were stained with DAPI (blue) and images obtained using a  
810 Leica TCS SP5 confocal microscope. Graphs show line fluorescent intensity profile  
811 along the indicated white lines. **(C)** MDBK, Hep2 and BEAS-2B cells were infected  
812 with b/hRSV for 24 hrs, fixed and immuno-stained for RSV N (green) or NF- $\kappa$ B p65  
813 (red). **(D)** Vero cells were co-transfected with equimolar concentrations of plasmids  
814 expressing hRSV N (pN) and/or P (pP) proteins as indicated. Following 24 h  
815 incubation, cells were fixed and stained with anti-RSV N (green/red) and anti-RSV P  
816 (green) or anti-NF- $\kappa$ B p65 (red) antibodies. Cell nuclei were stained with DAPI (blue)  
817 and confocal analysis performed. The bottom panels show a higher magnification of  
818 the boxed area and a graph with the fluorescent intensity profiles along the indicated  
819 white line.

820

## 821 References

- 822 1. Hogan, A.B., et al., *Exploring the dynamics of respiratory syncytial virus (RSV)*  
823 *transmission in children*. Theoretical Population Biology, 2016. **110**: p. 78-85.
- 824 2. Falsey, A.R., et al., *Respiratory syncytial virus infection in elderly and high-risk*  
825 *adults*. N Engl J Med, 2005. **352**(17): p. 1749-59.
- 826 3. Habibi, M.S., et al., *Impaired Antibody-mediated Protection and Defective IgA*  
827 *B-Cell Memory in Experimental Infection of Adults with Respiratory Syncytial*  
828 *Virus*. American Journal of Respiratory and Critical Care Medicine, 2015.  
829 **191**(9): p. 1040-1049.

Jobe et al., 2020

- 830 4. Guzman, E. and G. Taylor, *Immunology of bovine respiratory syncytial virus in*  
831 *calves*. Mol Immunol, 2015. **66**(1): p. 48-56.
- 832 5. Amarasinghe, G.K., et al., *Taxonomy of the order Mononegavirales: update*  
833 *2017*. Archives of Virology, 2017: p. 1-12.
- 834 6. Liu, P., et al., *Retinoic acid-inducible gene I mediates early antiviral response*  
835 *and Toll-like receptor 3 expression in respiratory syncytial virus-infected airway*  
836 *epithelial cells*. J Virol, 2007. **81**(3): p. 1401-11.
- 837 7. Yoboua, F., et al., *Respiratory syncytial virus-mediated NF-kappa B p65*  
838 *phosphorylation at serine 536 is dependent on RIG-I, TRAF6, and IKK beta*. J  
839 Virol, 2010. **84**(14): p. 7267-77.
- 840 8. Baum, A. and A. Garcia-Sastre, *Induction of type I interferon by RNA viruses:*  
841 *cellular receptors and their substrates*. Amino Acids, 2010. **38**(5): p. 1283-99.
- 842 9. Mitchell, S., J. Vargas, and A. Hoffmann, *Signaling via the NFkappaB system*.  
843 Wiley Interdiscip Rev Syst Biol Med, 2016. **8**(3): p. 227-41.
- 844 10. Kanarek, N. and Y. Ben-Neriah, *Regulation of NF-kappaB by ubiquitination and*  
845 *degradation of the IkappaBs*. Immunol Rev, 2012. **246**(1): p. 77-94.
- 846 11. Hemmi, H., et al., *The roles of two IkappaB kinase-related kinases in*  
847 *lipopolysaccharide and double stranded RNA signaling and viral infection*. J  
848 Exp Med, 2004. **199**(12): p. 1641-50.
- 849 12. Deng, L., et al., *Suppression of NF-kappaB Activity: A Viral Immune Evasion*  
850 *Mechanism*. Viruses, 2018. **10**(8).
- 851 13. Chiang, H.S. and H.M. Liu, *The Molecular Basis of Viral Inhibition of IRF- and*  
852 *STAT-Dependent Immune Responses*. Front Immunol, 2018. **9**: p. 3086.
- 853 14. Pollock, N., et al., *Modulation of the transcription factor NF-kappaB in antigen-*  
854 *presenting cells by bovine respiratory syncytial virus small hydrophobic protein*.  
855 J Gen Virol, 2017. **98**(7): p. 1587-1599.
- 856 15. Taylor, G., et al., *Recombinant bovine respiratory syncytial virus with deletion*  
857 *of the SH gene induces increased apoptosis and pro-inflammatory cytokines in*  
858 *vitro, and is attenuated and induces protective immunity in calves*. Journal of  
859 General Virology, 2014. **95**: p. 1244-1254.
- 860 16. Spann, K.M., et al., *Suppression of the induction of alpha, beta, and lambda*  
861 *interferons by the NS1 and NS2 proteins of human respiratory syncytial virus in*  
862 *human epithelial cells and macrophages [corrected]*. J Virol, 2004. **78**(8): p.  
863 4363-9.

Jobe et al., 2020

- 864 17. Spann, K.M., K.C. Tran, and P.L. Collins, *Effects of nonstructural proteins NS1*  
865 *and NS2 of human respiratory syncytial virus on interferon regulatory factor 3,*  
866 *NF-kappaB, and proinflammatory cytokines.* J Virol, 2005. **79**(9): p. 5353-62.
- 867 18. Schlender, J., et al., *Bovine respiratory syncytial virus nonstructural proteins*  
868 *NS1 and NS2 cooperatively antagonize alpha/beta interferon-induced antiviral*  
869 *response.* J Virol, 2000. **74**(18): p. 8234-42.
- 870 19. Lo, M.S., R.M. Brazas, and M.J. Holtzman, *Respiratory syncytial virus*  
871 *nonstructural proteins NS1 and NS2 mediate inhibition of Stat2 expression and*  
872 *alpha/beta interferon responsiveness.* J Virol, 2005. **79**(14): p. 9315-9.
- 873 20. Ling, Z., K.C. Tran, and M.N. Teng, *Human respiratory syncytial virus*  
874 *nonstructural protein NS2 antagonizes the activation of beta interferon*  
875 *transcription by interacting with RIG-I.* J Virol, 2009. **83**(8): p. 3734-42.
- 876 21. Boyapalle, S., et al., *Respiratory syncytial virus NS1 protein colocalizes with*  
877 *mitochondrial antiviral signaling protein MAVS following infection.* PLoS One,  
878 2012. **7**(2): p. e29386.
- 879 22. Goswami, R., et al., *Viral degradasome hijacks mitochondria to suppress innate*  
880 *immunity.* Cell Res, 2013. **23**(8): p. 1025-42.
- 881 23. Kotelkin, A., et al., *The NS2 protein of human respiratory syncytial virus*  
882 *suppresses the cytotoxic T-cell response as a consequence of suppressing the*  
883 *type I interferon response.* J Virol, 2006. **80**(12): p. 5958-67.
- 884 24. Lifland, A.W., et al., *Human respiratory syncytial virus nucleoprotein and*  
885 *inclusion bodies antagonize the innate immune response mediated by MDA5*  
886 *and MAVS.* J Virol, 2012. **86**(15): p. 8245-58.
- 887 25. Fricke, J., et al., *p38 and OGT sequestration into viral inclusion bodies in cells*  
888 *infected with human respiratory syncytial virus suppresses MK2 activities and*  
889 *stress granule assembly.* J Virol, 2013. **87**(3): p. 1333-47.
- 890 26. Rincheval, V., et al., *Functional organization of cytoplasmic inclusion bodies in*  
891 *cells infected by respiratory syncytial virus.* Nat Commun, 2017. **8**(1): p. 563.
- 892 27. Nikolic, J., et al., *Rabies Virus Infection Induces the Formation of Stress*  
893 *Granules Closely Connected to the Viral Factories.* PLoS Pathog, 2016. **12**(10):  
894 p. e1005942.
- 895 28. Nikolic, J., et al., *Negri bodies are viral factories with properties of liquid*  
896 *organelles.* Nat Commun, 2017. **8**(1): p. 58.



Jobe et al., 2020

- 897 29. Cifuentes-Munoz, N., et al., *Human Metapneumovirus Induces Formation of*  
898 *Inclusion Bodies for Efficient Genome Replication and Transcription.* J Virol,  
899 2017. **91**(24).
- 900 30. Zhou, Y., et al., *Measles Virus Forms Inclusion Bodies with Properties of Liquid*  
901 *Organelles.* J Virol, 2019. **93**(21).
- 902 31. Garcia, J., et al., *Cytoplasmic inclusions of respiratory syncytial virus-infected*  
903 *cells: formation of inclusion bodies in transfected cells that coexpress the*  
904 *nucleoprotein, the phosphoprotein, and the 22K protein.* Virology, 1993. **195**(1):  
905 p. 243-7.
- 906 32. Ringel, M., et al., *Nipah virus induces two inclusion body populations:*  
907 *Identification of novel inclusions at the plasma membrane.* PLoS Pathog, 2019.  
908 **15**(4): p. e1007733.
- 909 33. White, J.P. and R.E. Lloyd, *Regulation of stress granules in virus systems.*  
910 Trends Microbiol, 2012. **20**(4): p. 175-83.
- 911 34. Lindquist, M.E., et al., *Respiratory syncytial virus induces host RNA stress*  
912 *granules to facilitate viral replication.* J Virol, 2010. **84**(23): p. 12274-84.
- 913 35. Hanley, L.L., et al., *Roles of the respiratory syncytial virus trailer region: effects*  
914 *of mutations on genome production and stress granule formation.* Virology,  
915 2010. **406**(2): p. 241-52.
- 916 36. Lindquist, M.E., et al., *Activation of protein kinase R is required for induction of*  
917 *stress granules by respiratory syncytial virus but dispensable for viral*  
918 *replication.* Virology, 2011. **413**(1): p. 103-10.
- 919 37. Ghildyal, R., et al., *Respiratory syncytial virus matrix protein associates with*  
920 *nucleocapsids in infected cells.* J Gen Virol, 2002. **83**(Pt 4): p. 753-7.
- 921 38. Shahriari, S., K.J. Wei, and R. Ghildyal, *Respiratory Syncytial Virus Matrix (M)*  
922 *Protein Interacts with Actin In Vitro and in Cell Culture.* Viruses, 2018. **10**(10).
- 923 39. Lahaye, X., et al., *Functional characterization of Negri bodies (NBs) in rabies*  
924 *virus-infected cells: Evidence that NBs are sites of viral transcription and*  
925 *replication.* J Virol, 2009. **83**(16): p. 7948-58.
- 926 40. Buchholz, U.J., S. Finke, and K.K. Conzelmann, *Generation of bovine*  
927 *respiratory syncytial virus (BRSV) from cDNA: BRSV NS2 is not essential for*  
928 *virus replication in tissue culture, and the human RSV leader region acts as a*  
929 *functional BRSV genome promoter.* J Virol, 1999. **73**(1): p. 251-9.



Jobe et al., 2020

- 930 41. Carromeu, C., et al., *Intracellular localization of human respiratory syncytial*  
931 *virus L protein*. Arch Virol, 2007. **152**(12): p. 2259-63.
- 932 42. Alberti, S., A. Gladfelter, and T. Mittag, *Considerations and Challenges in*  
933 *Studying Liquid-Liquid Phase Separation and Biomolecular Condensates*. Cell,  
934 2019. **176**(3): p. 419-434.
- 935 43. Murthy, A.C. and N.L. Fawzi, *The (un)structural biology of biomolecular liquid-*  
936 *liquid phase separation using NMR spectroscopy*. J Biol Chem, 2020.
- 937 44. Mudogo, C.N., et al., *Protein phase separation and determinants of in cell*  
938 *crystallization*. Traffic, 2019.
- 939 45. Perez-Pepe, M., A.J. Fernandez-Alvarez, and G.L. Boccaccio, *Life and Work*  
940 *of Stress Granules and Processing Bodies: New Insights into Their Formation*  
941 *and Function*. Biochemistry, 2018. **57**(17): p. 2488-2498.
- 942 46. Nikolic, J., et al., *[Rabies virus factories are formed by liquid-liquid phase*  
943 *separation]*. Med Sci (Paris), 2018. **34**(3): p. 203-205.
- 944 47. Shin, Y., et al., *Spatiotemporal Control of Intracellular Phase Transitions Using*  
945 *Light-Activated optoDroplets*. Cell, 2017. **168**(1-2): p. 159-171 e14.
- 946 48. Sun, Y. and C.B. Lopez, *The innate immune response to RSV: Advances in our*  
947 *understanding of critical viral and host factors*. Vaccine, 2017. **35**(3): p. 481-  
948 488.
- 949 49. Russell, R.F., et al., *Partial Attenuation of Respiratory Syncytial Virus with a*  
950 *Deletion of a Small Hydrophobic Gene Is Associated with Elevated Interleukin-*  
951 *1beta Responses*. J Virol, 2015. **89**(17): p. 8974-81.
- 952 50. Fuentes, S., et al., *Function of the respiratory syncytial virus small hydrophobic*  
953 *protein*. Journal of Virology, 2007. **81**(15): p. 8361-8366.
- 954 51. Richard, C.A., et al., *RSV hijacks cellular protein phosphatase 1 to regulate M2-*  
955 *1 phosphorylation and viral transcription*. PLoS Pathog, 2018. **14**(3): p.  
956 e1006920.
- 957 52. Karger, A., U. Schmidt, and U.J. Buchholz, *Recombinant bovine respiratory*  
958 *syncytial virus with deletions of the G or SH genes: G and F proteins bind*  
959 *heparin*. J Gen Virol, 2001. **82**(Pt 3): p. 631-40.
- 960 53. Taylor, G., et al., *Monoclonal antibodies protect against respiratory syncytial*  
961 *virus infection in mice*. Immunology, 1984. **52**(1): p. 137-42.

Jobe et al., 2020

- 962 54. Taylor, G., et al., *Protective epitopes on the fusion protein of respiratory*  
963 *syncytial virus recognized by murine and bovine monoclonal antibodies*. J Gen  
964 Virol, 1992. **73 ( Pt 9)**: p. 2217-23.

965
